# Supplementary material
Source: PubMed Central journal article supplement (PMC2867451)

Pulse Sequence: s2pu1  
Solvent: CDCl3  
Ambient temperature  
GEMINI-300 "m56965"  
PULSE SEQUENCE  
Relax. delay 1.000 sec  
Pulse 33.3 degrees  
Acq. time 1.998 sec  
Width 4500.5 Hz  
16 repetitions  
OBSERVE H1, 500.13608948 MHz  
DATA PROCESSING  
FT size 32768  
Total time 0 min 0 sec

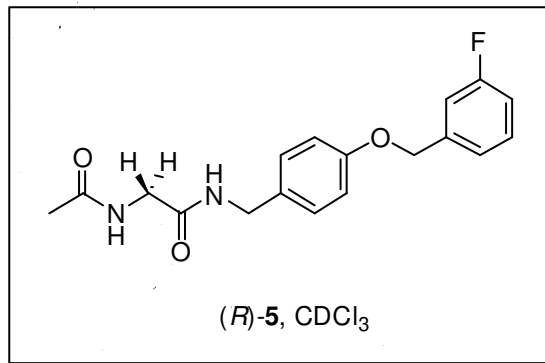

W = Water  
S = Solvent  
I = Impurity

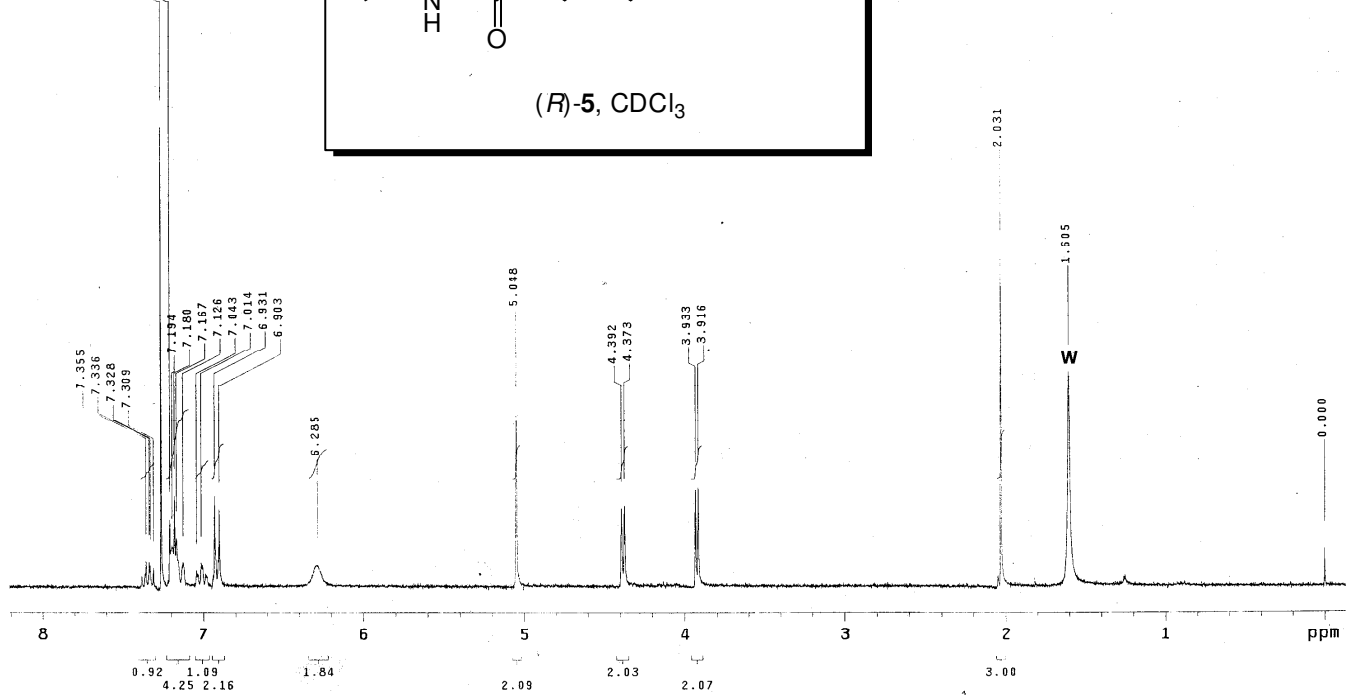

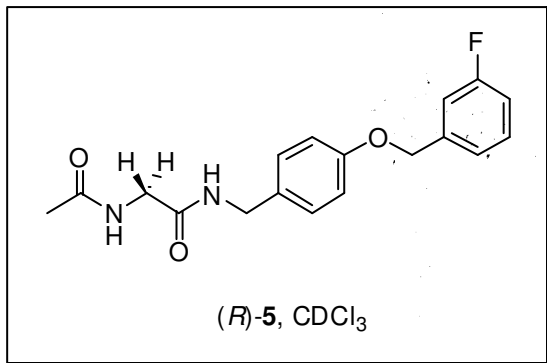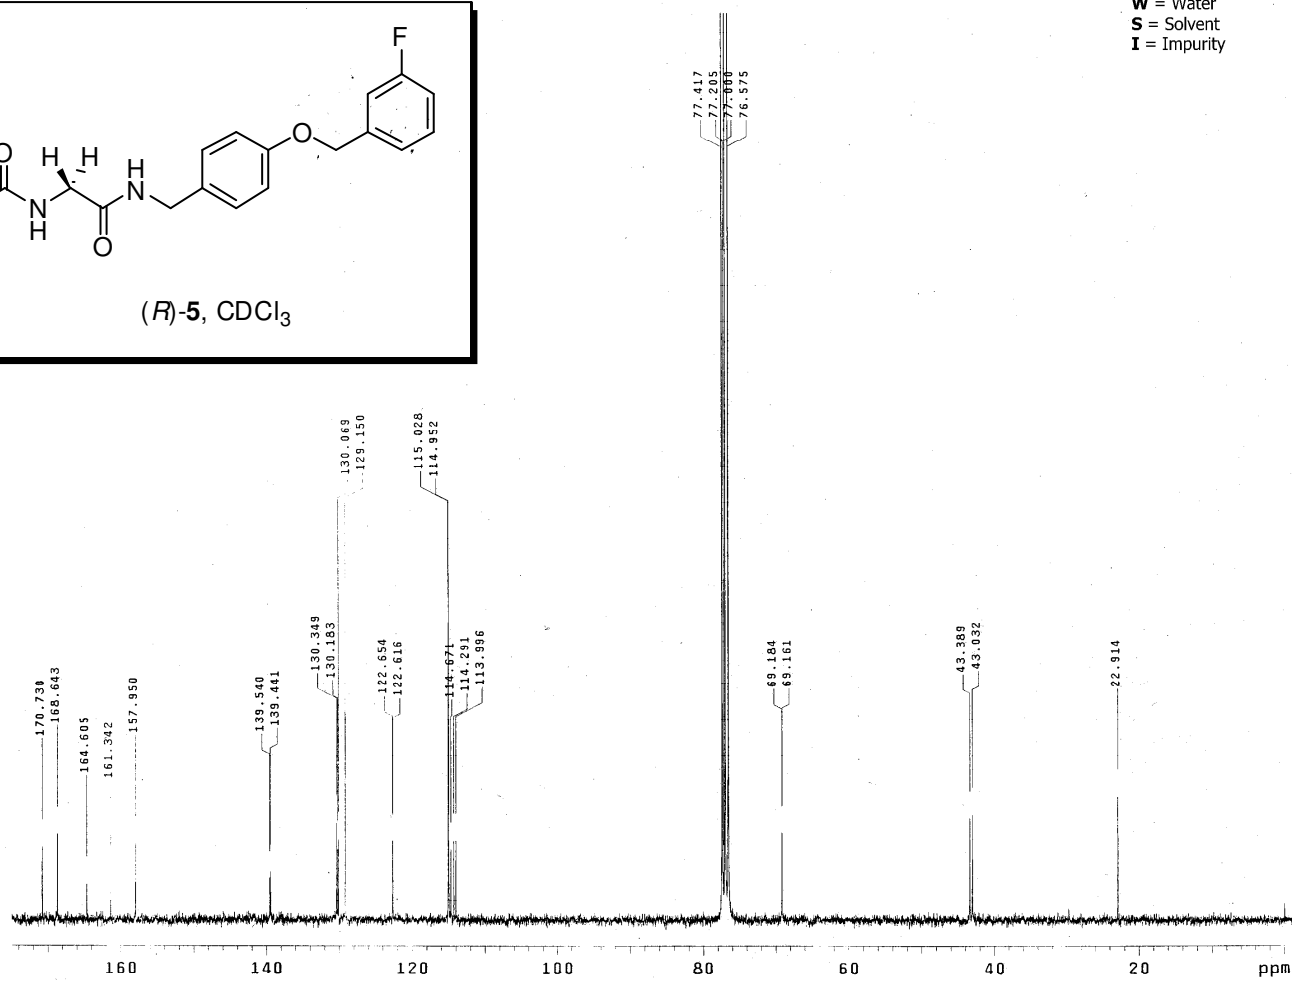

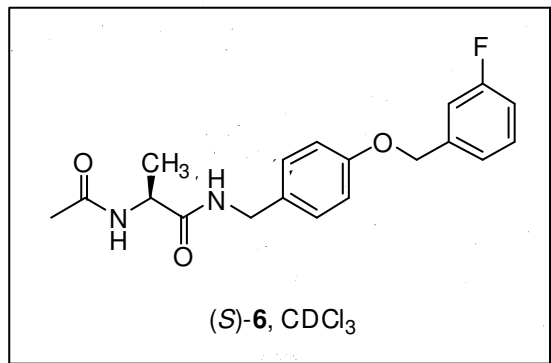

W = Water  
 S = Solvent  
 I = Impurity

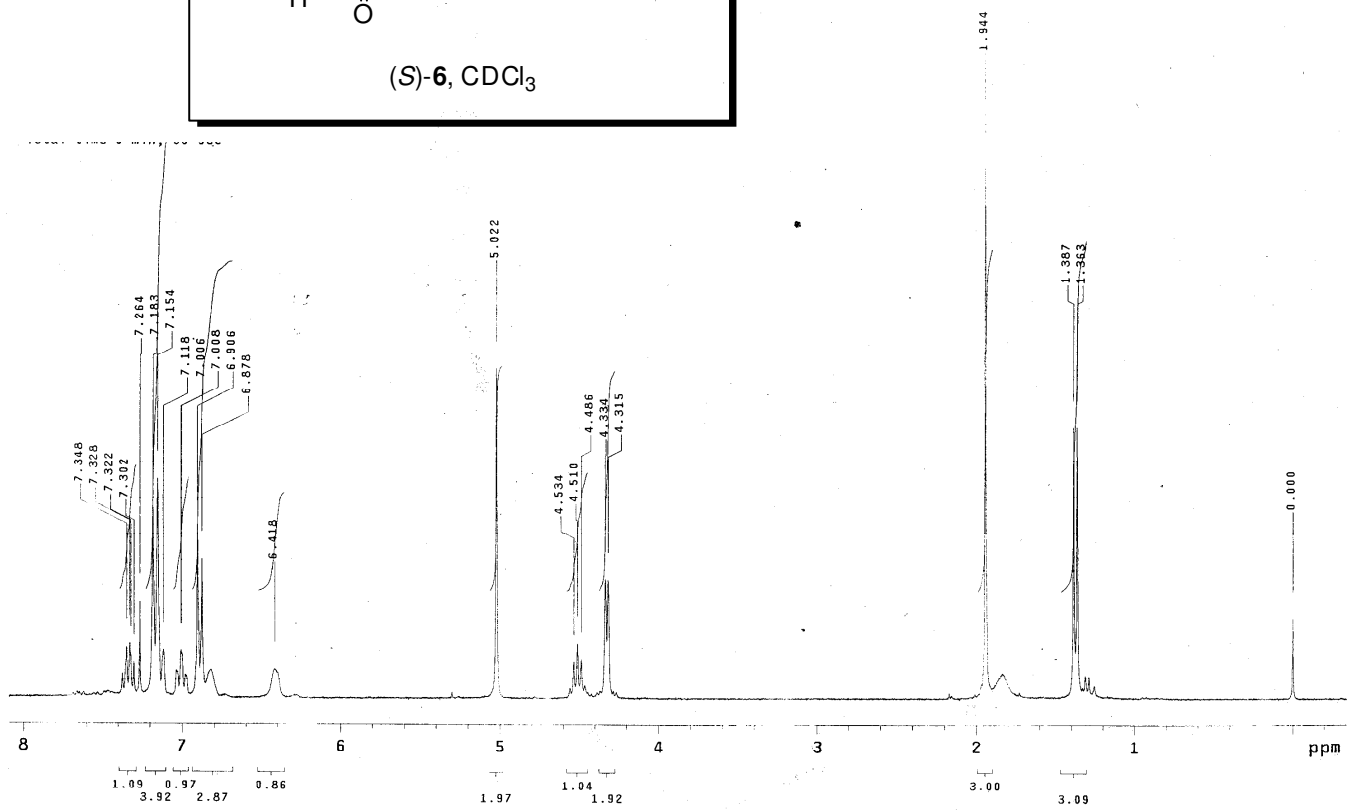

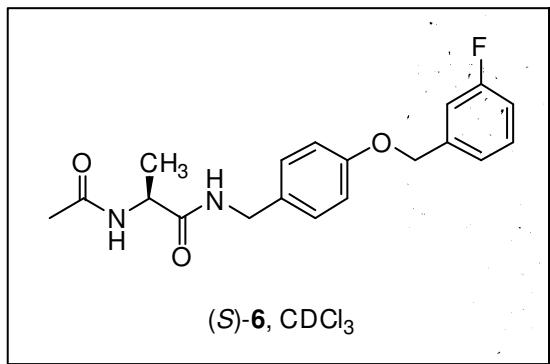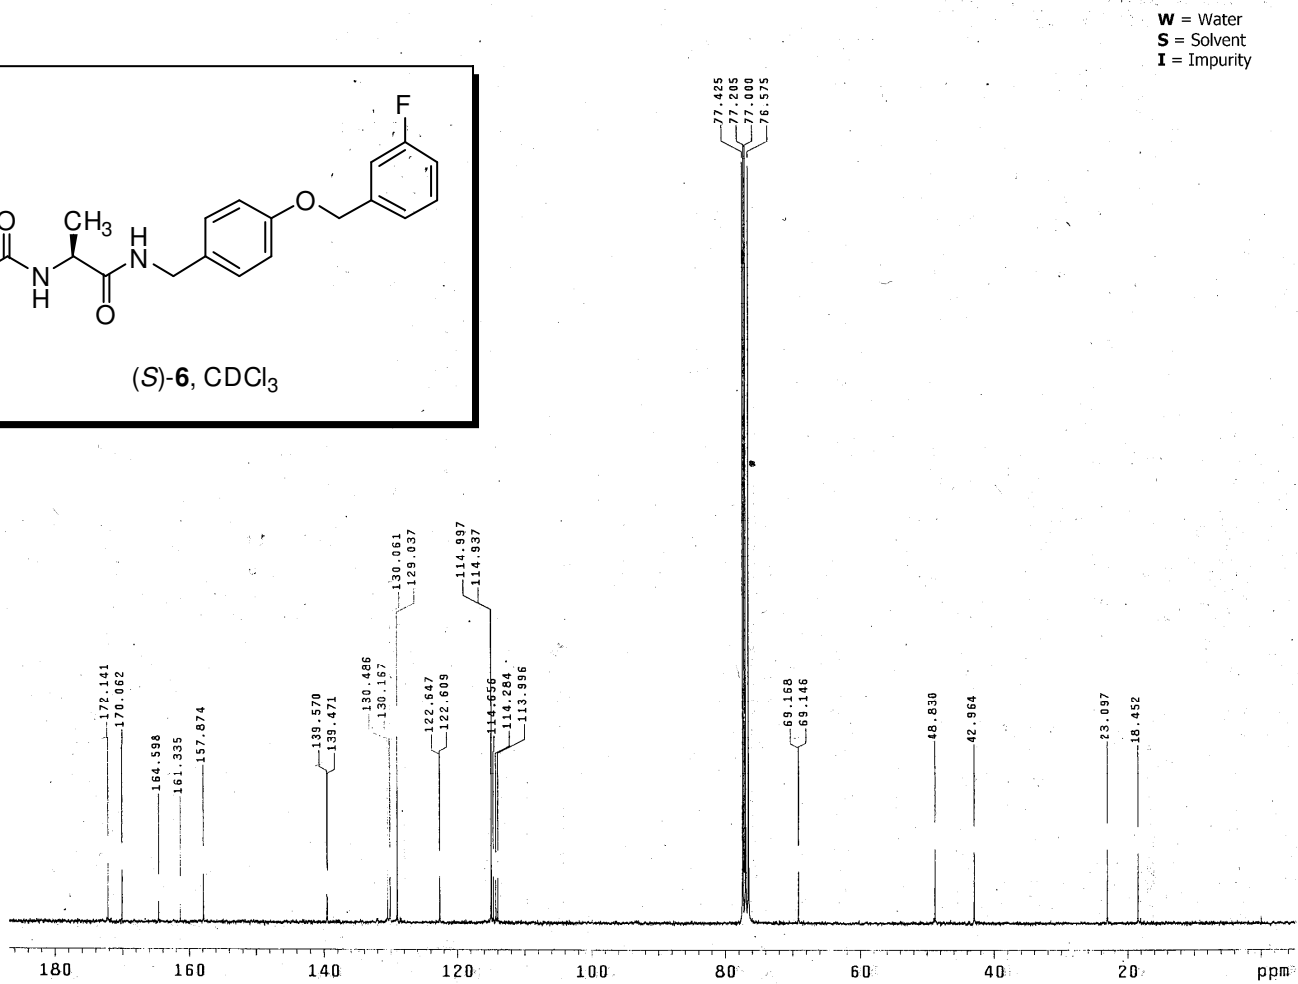

W = Water  
S = Solvent  
I = Impurity

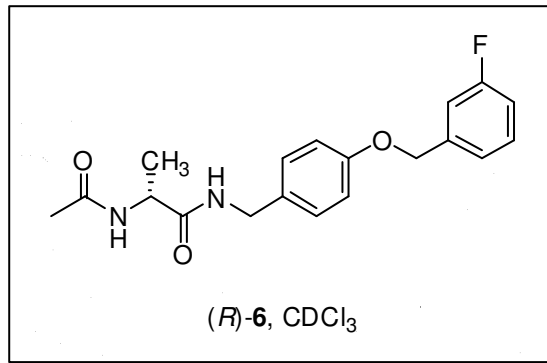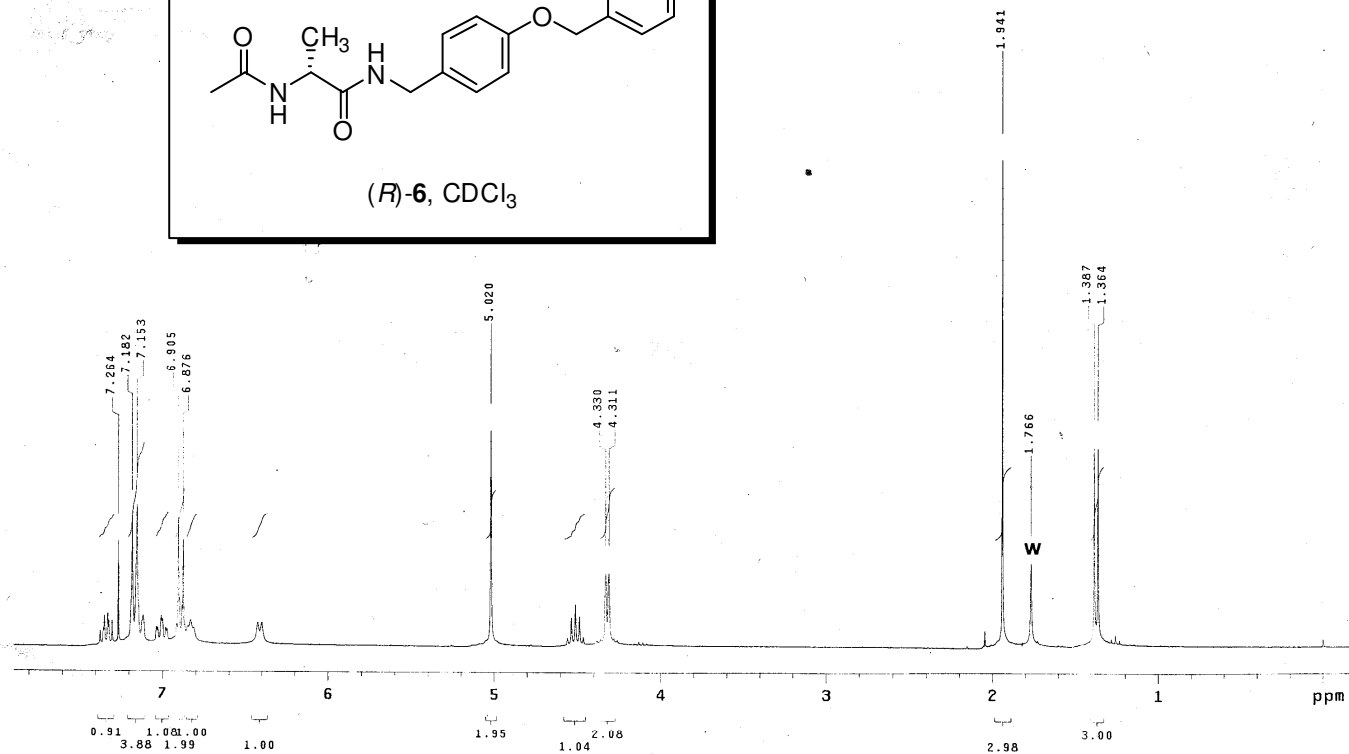

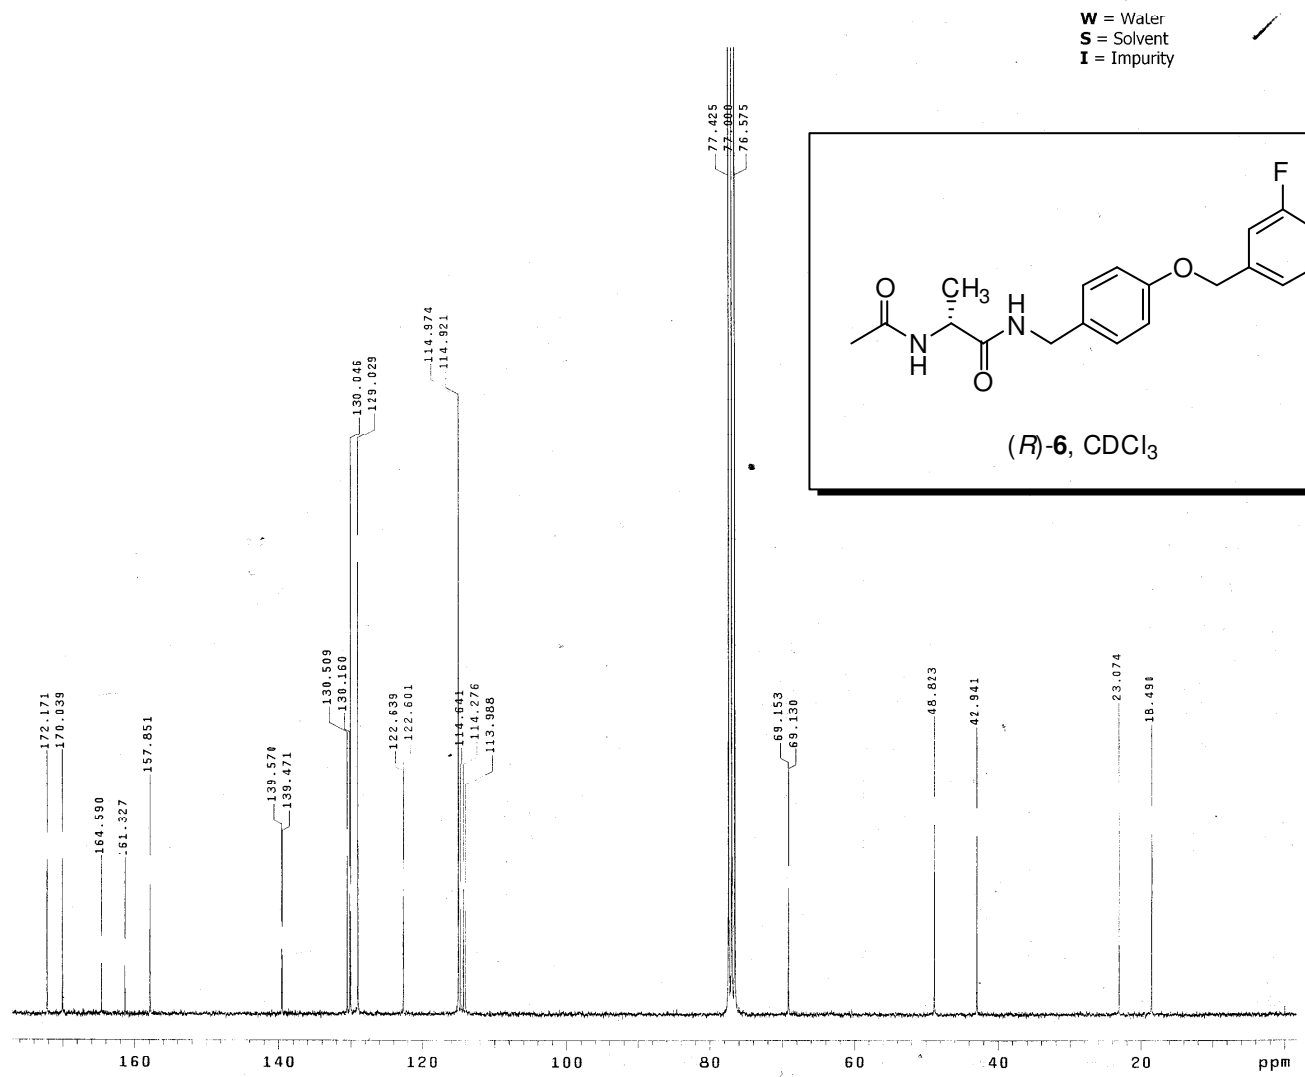

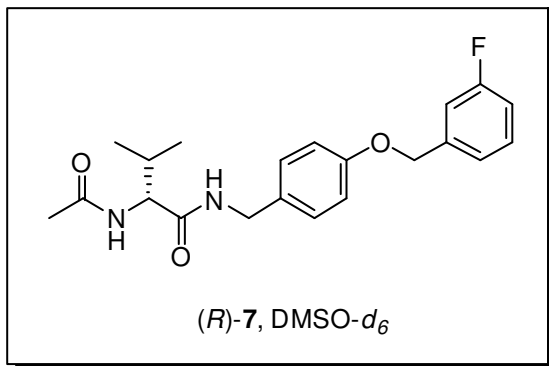

W = Water  
 S = Solvent  
 I = Impurity

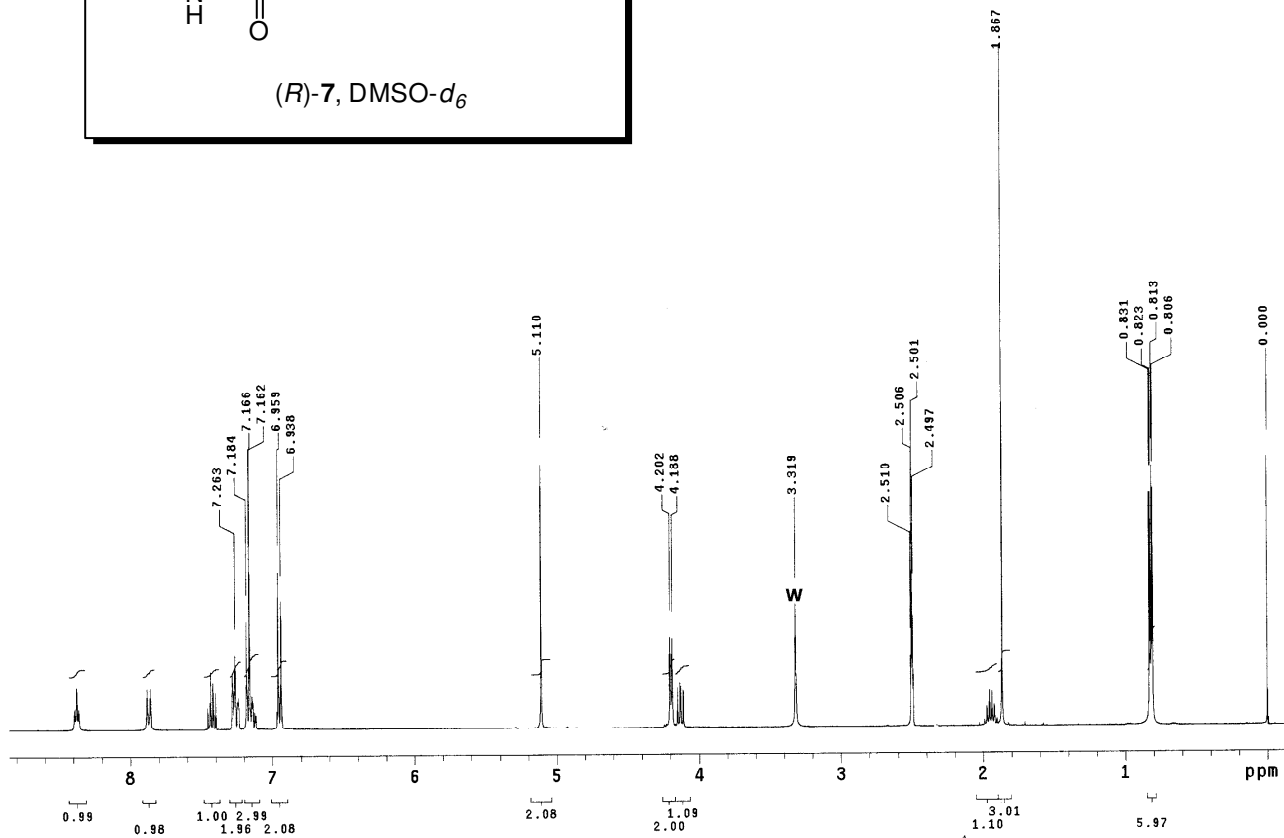

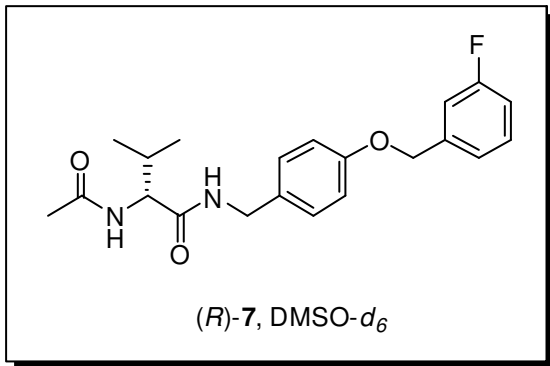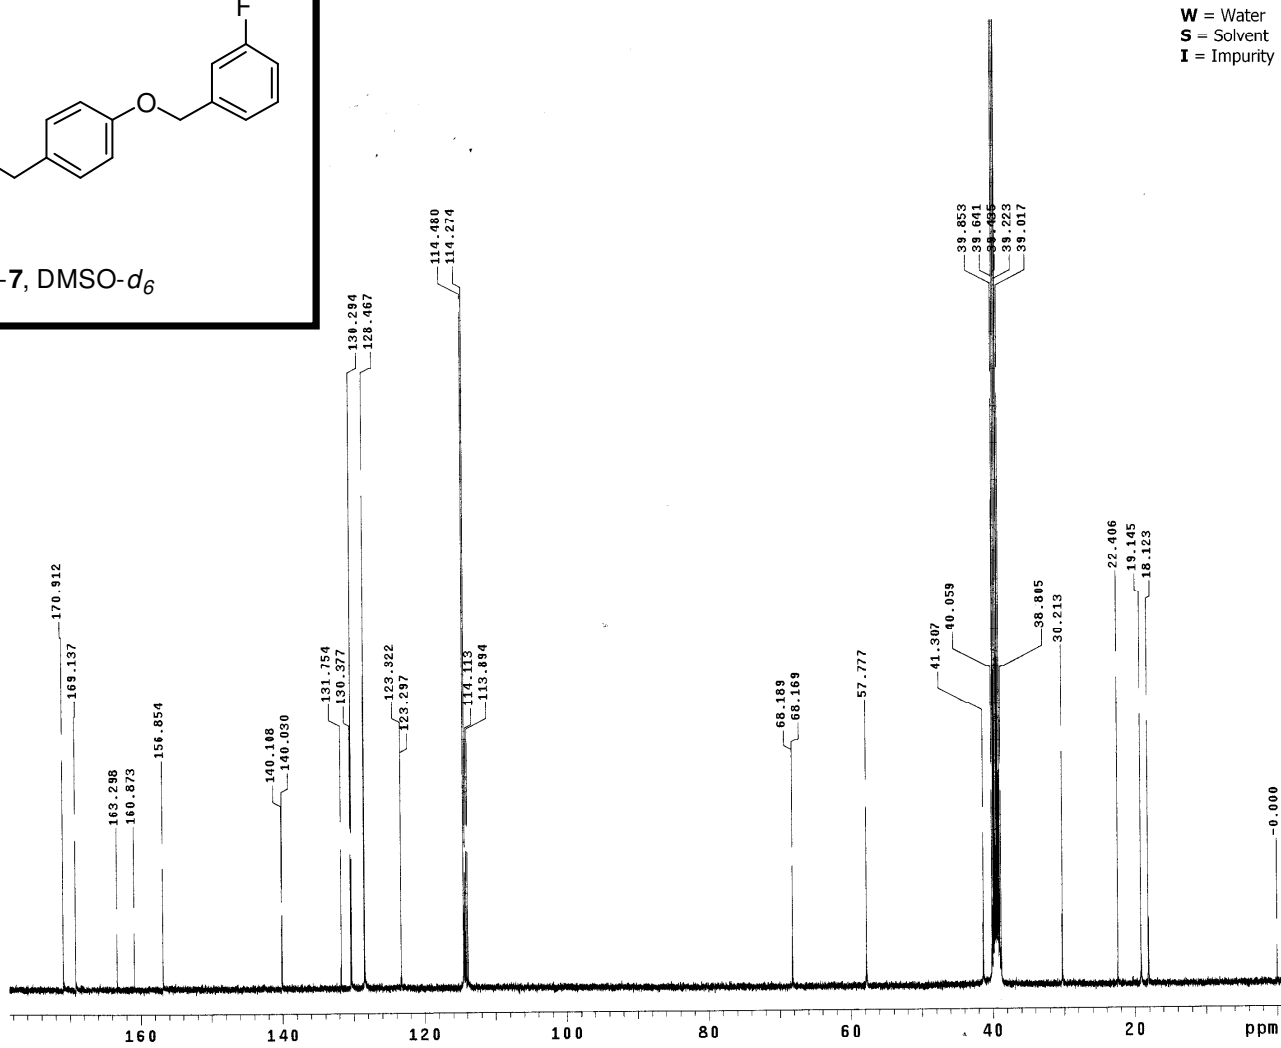



W = Water  
S = Solvent  
I = Impurity

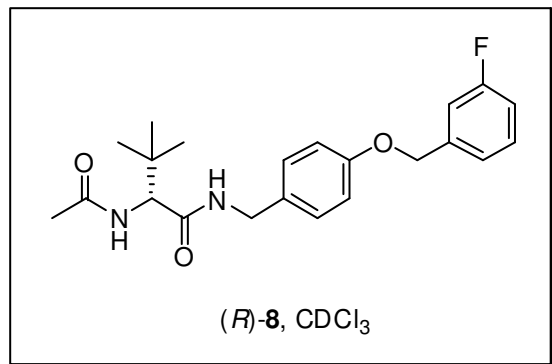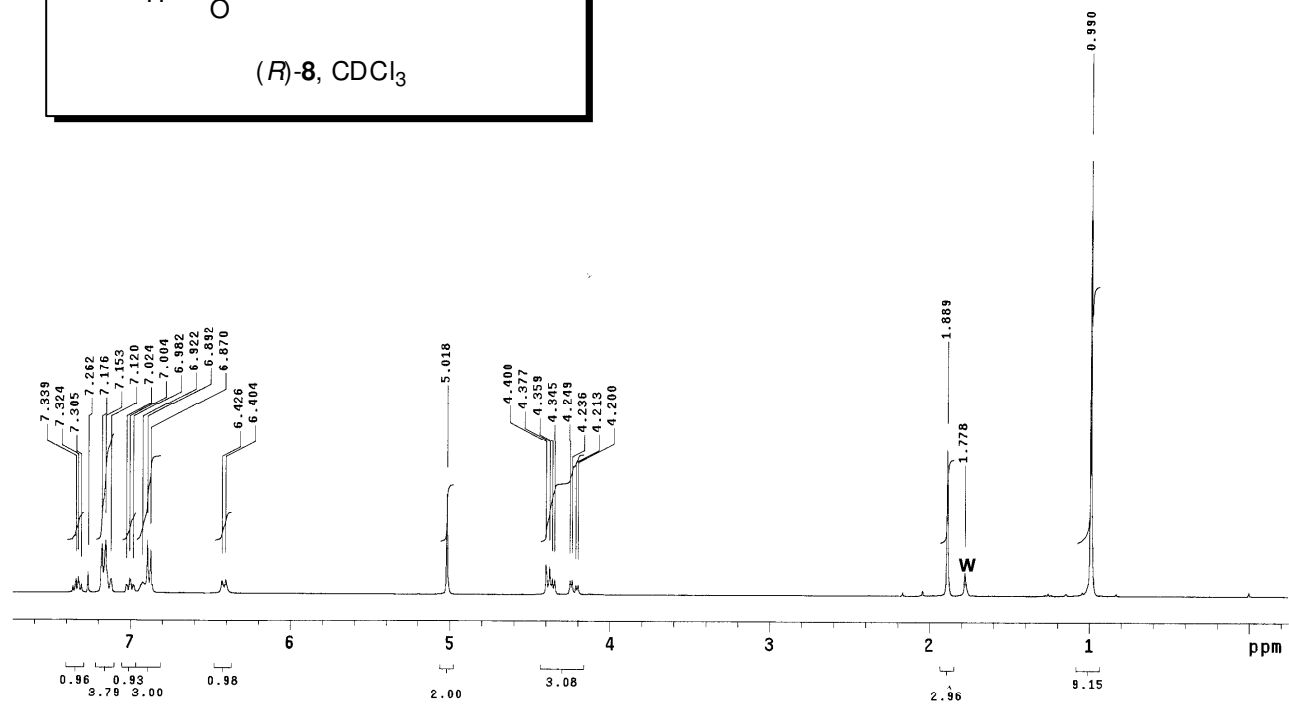

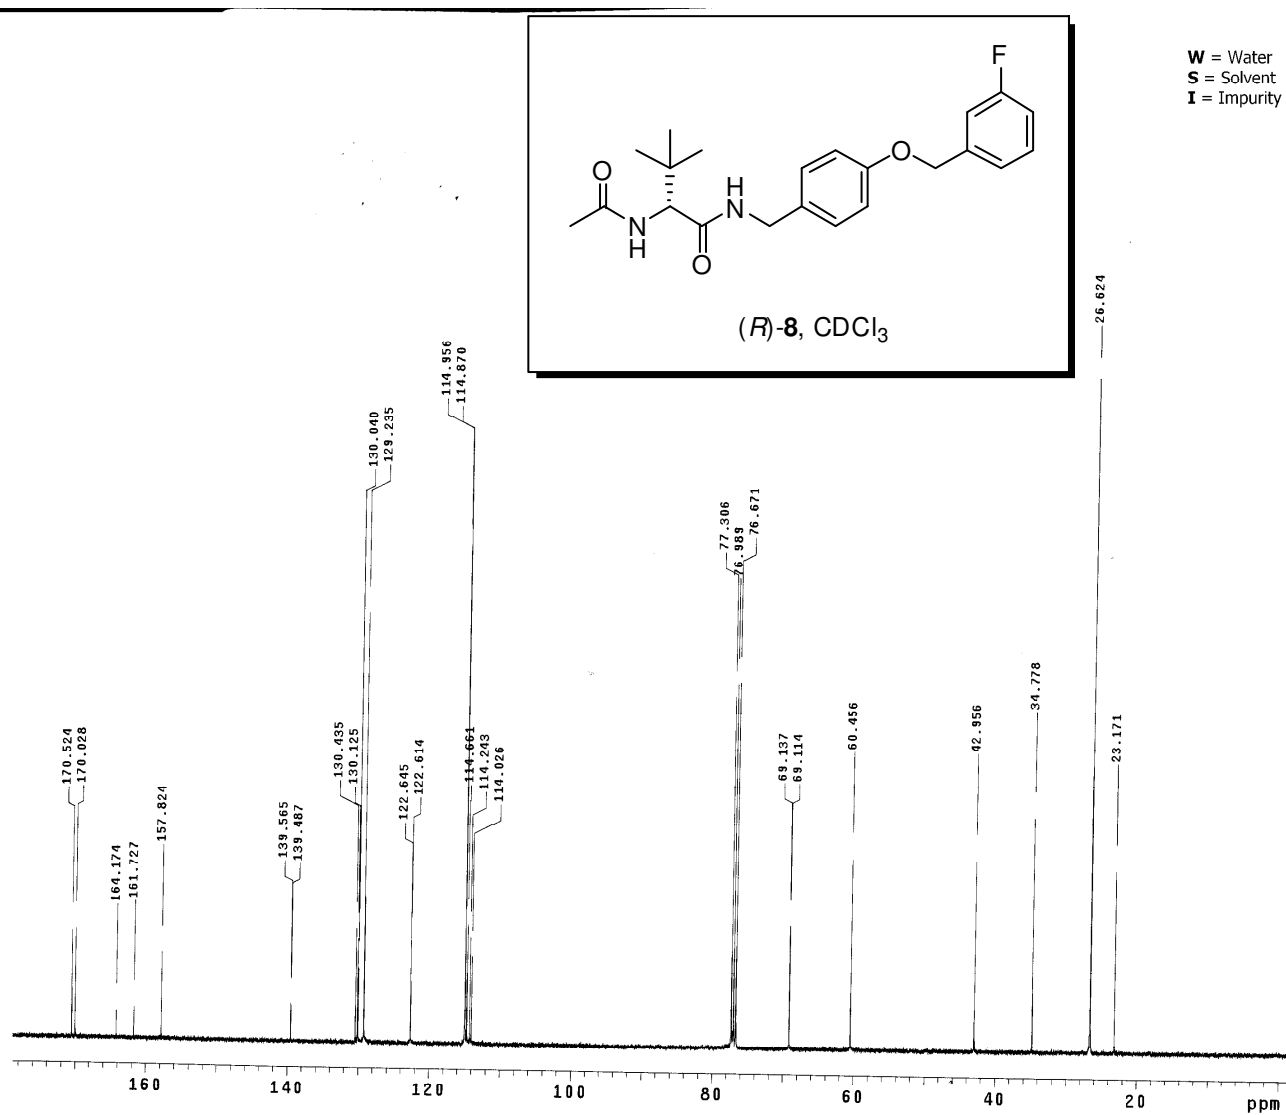

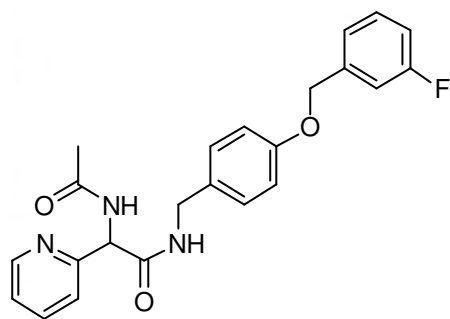

9, CDCl<sub>3</sub>

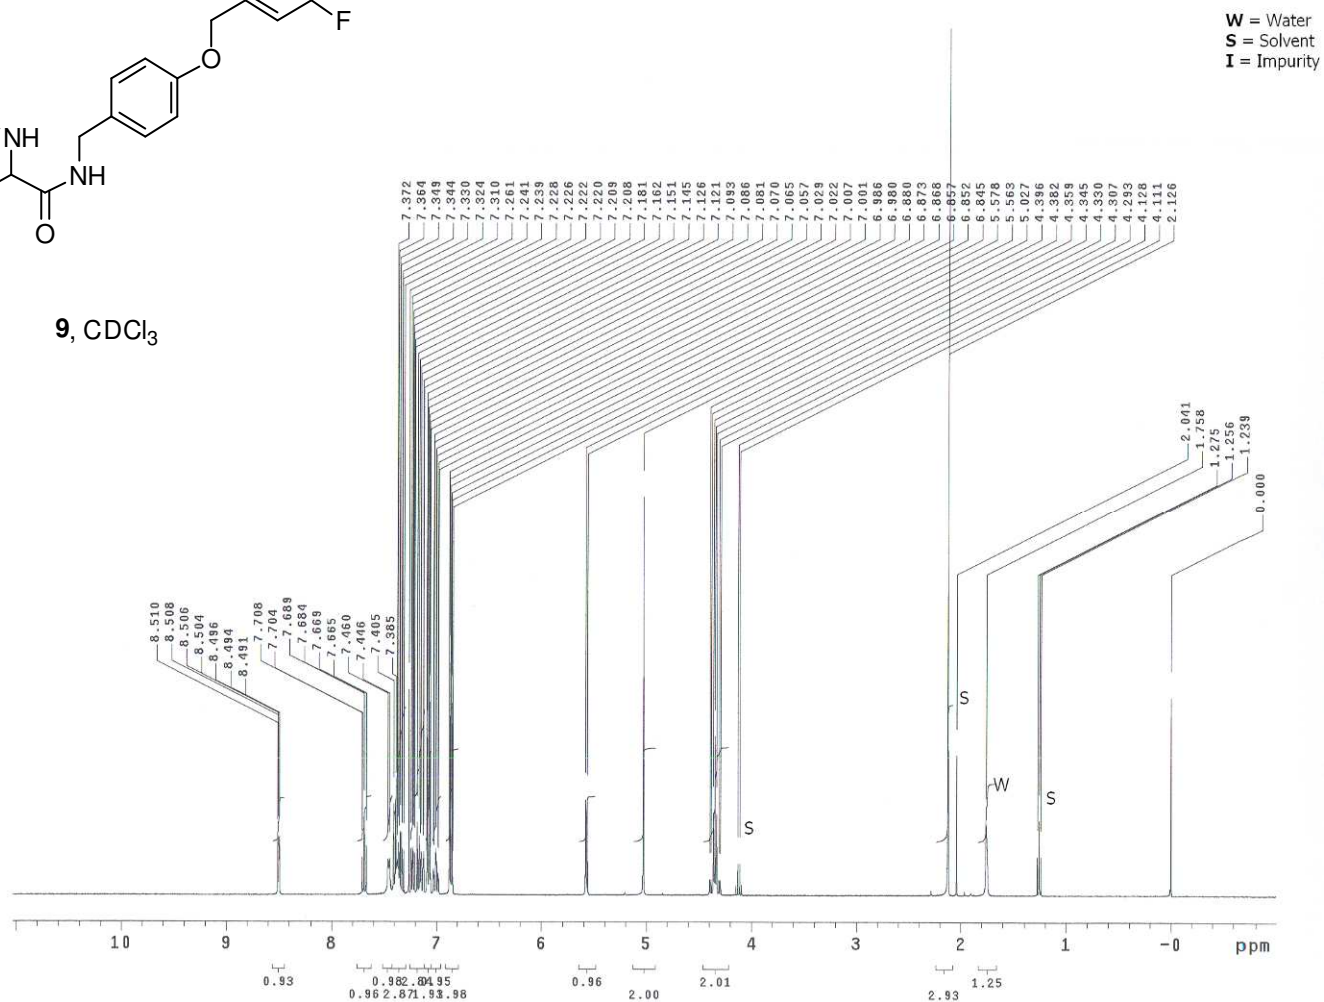

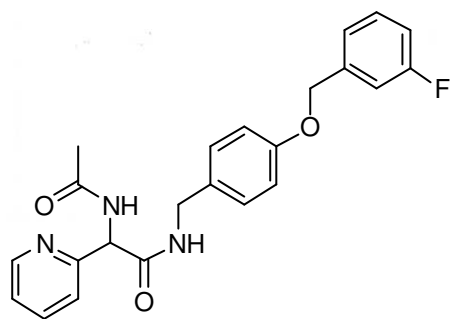

9, CDCl<sub>3</sub>

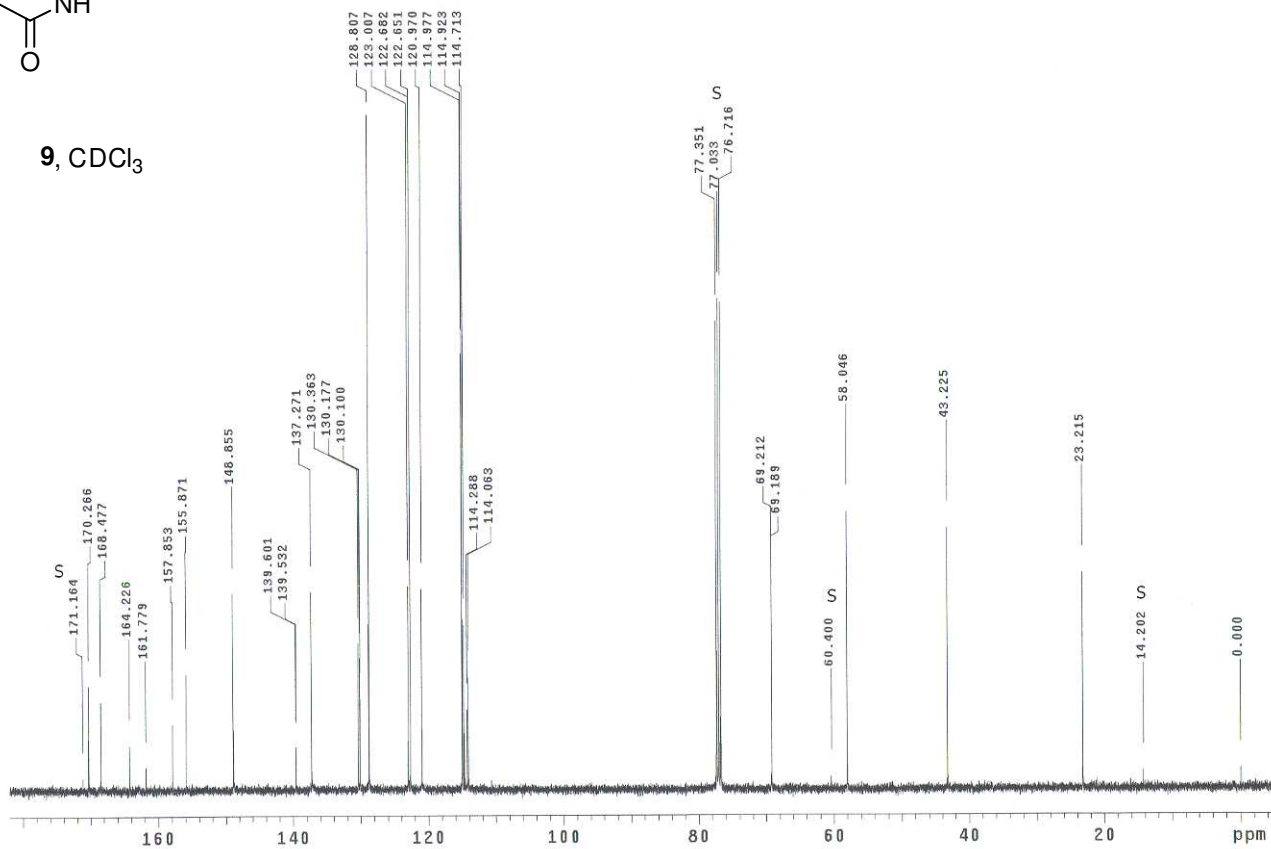

W = Water  
S = Solvent  
I = Impurit

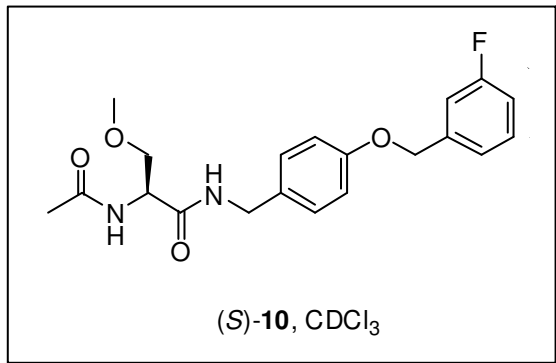

W = Water  
 S = Solvent  
 I = Impurity

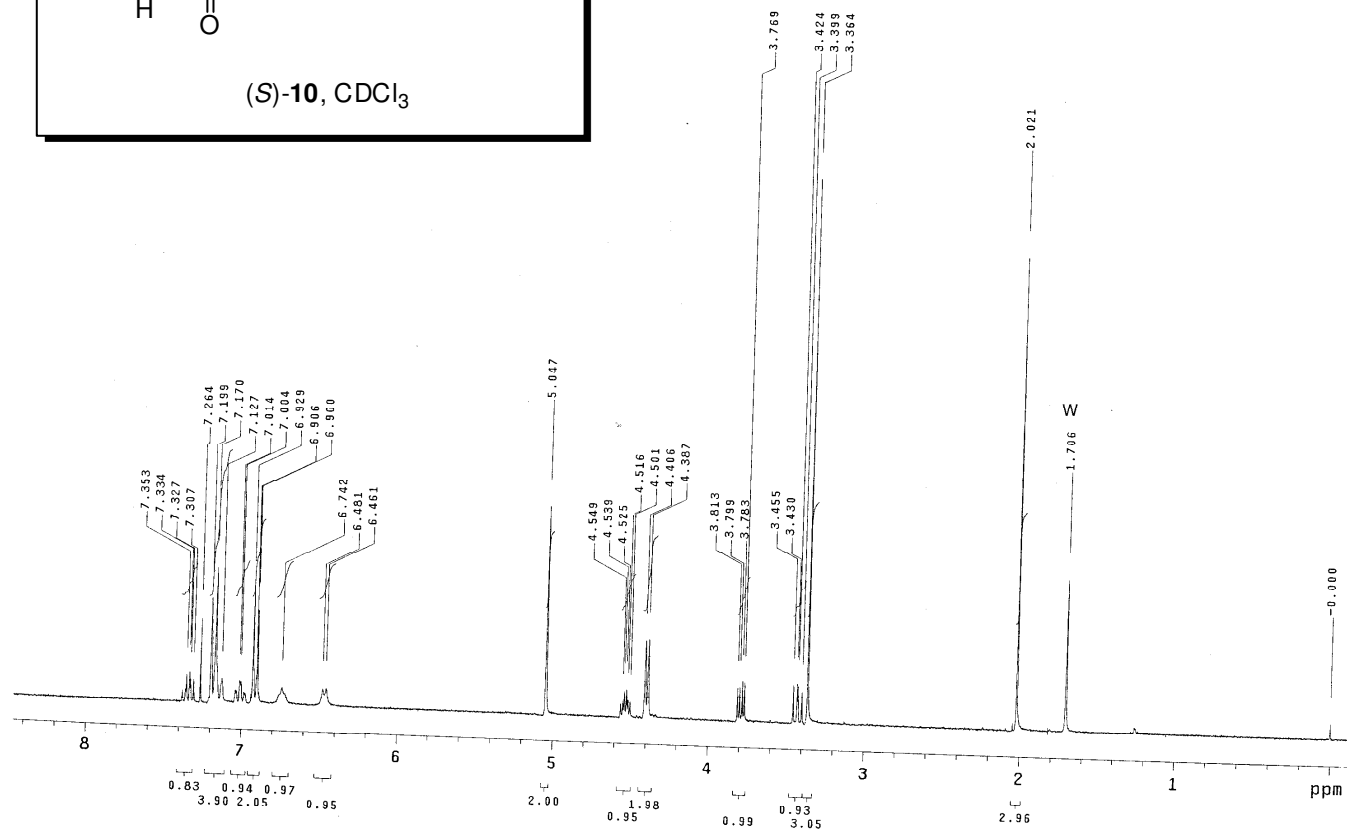

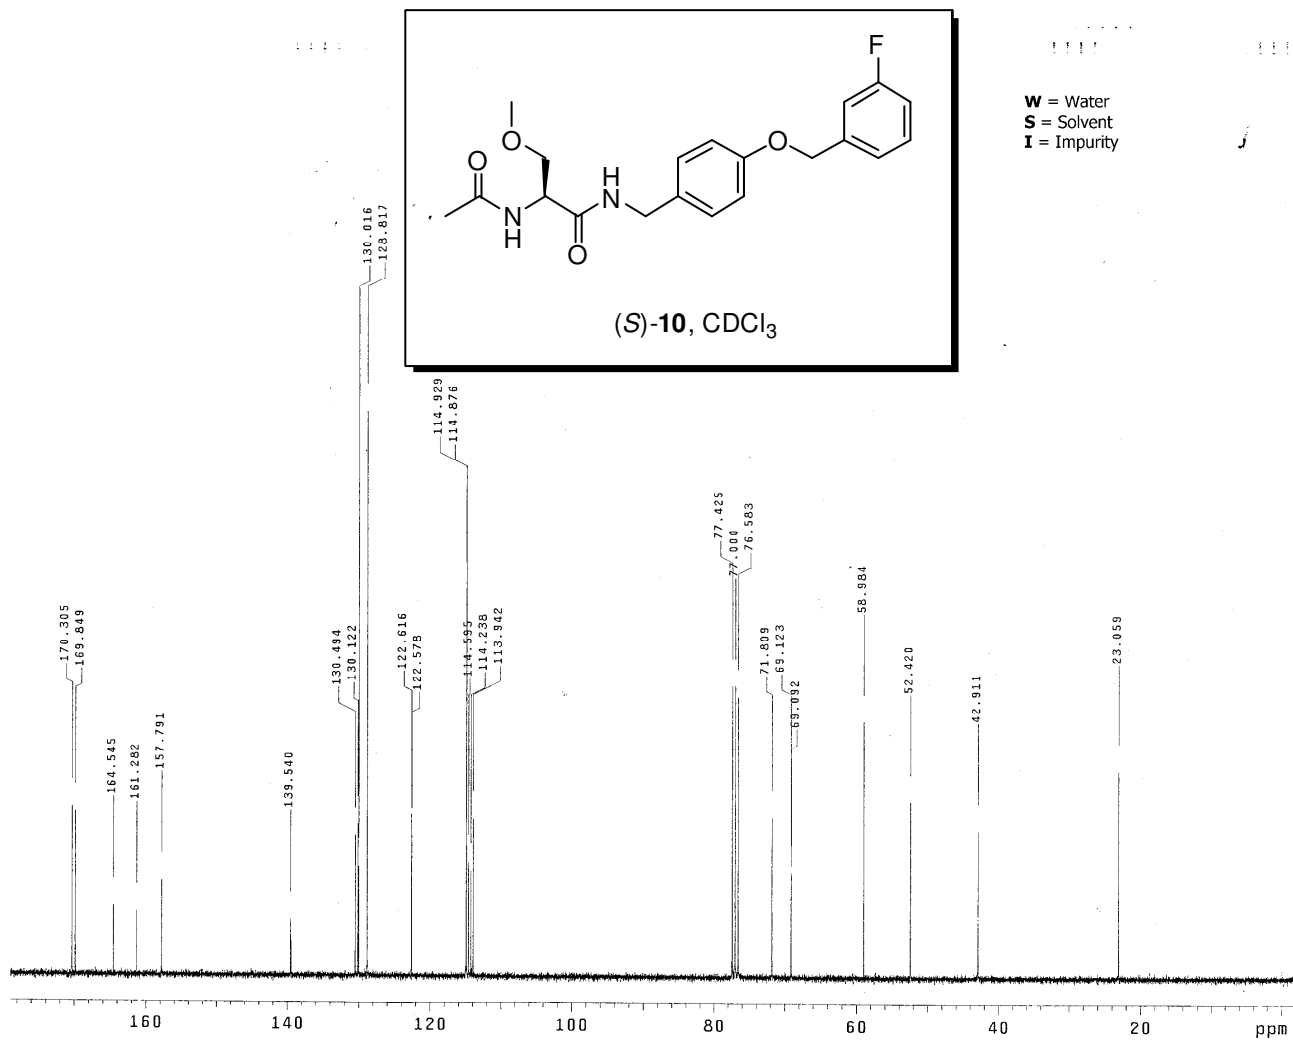

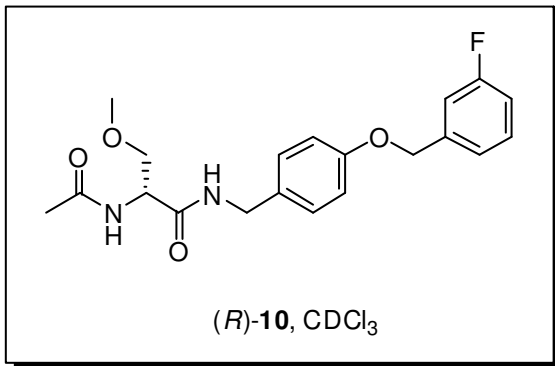

W = Water  
S = Solvent  
I = Impurity

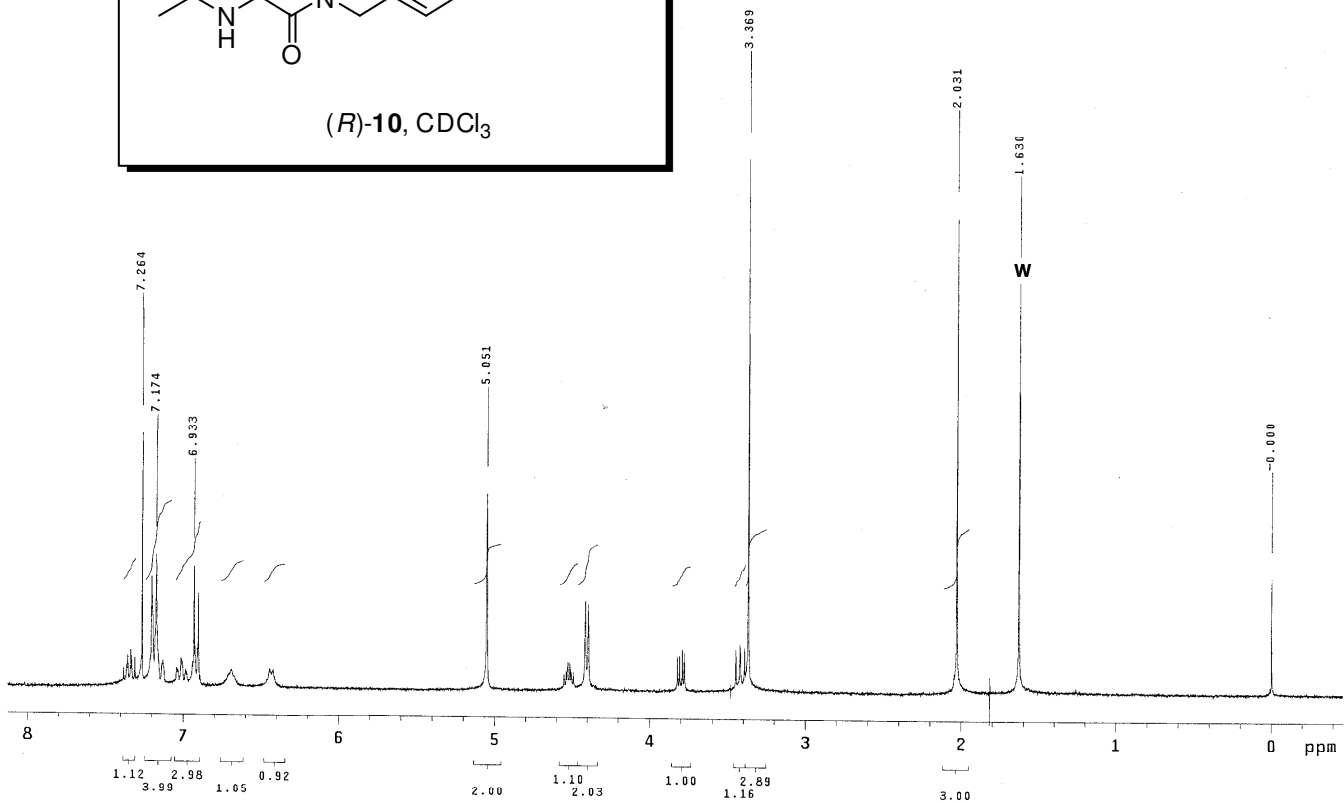

W = Water  
S = Solvent  
I = Impurity

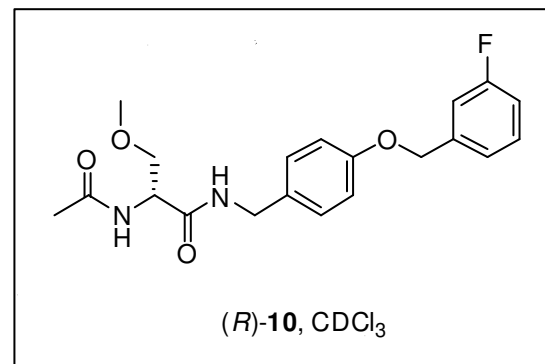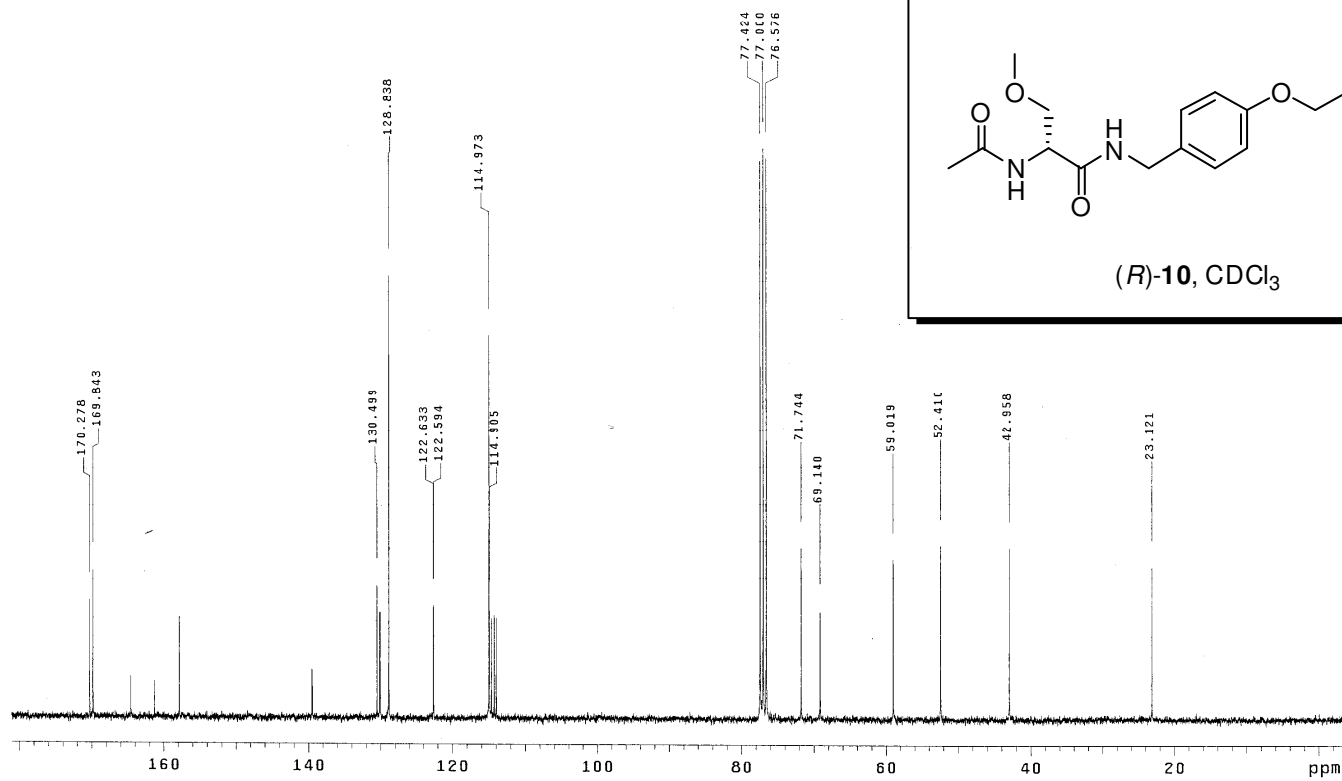



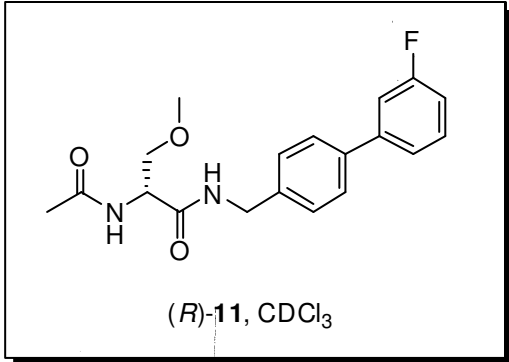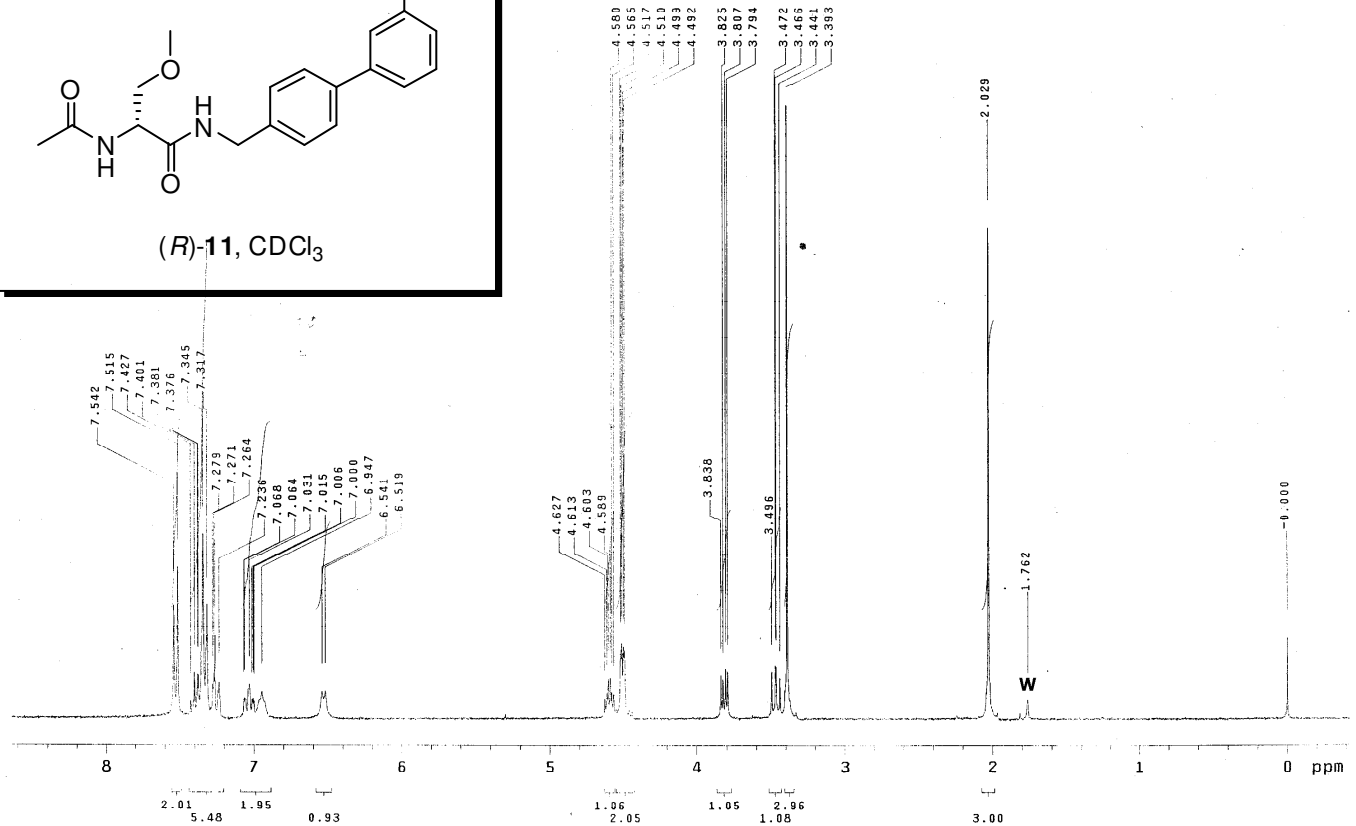

W = Water  
 S = Solvent  
 I = Impurity

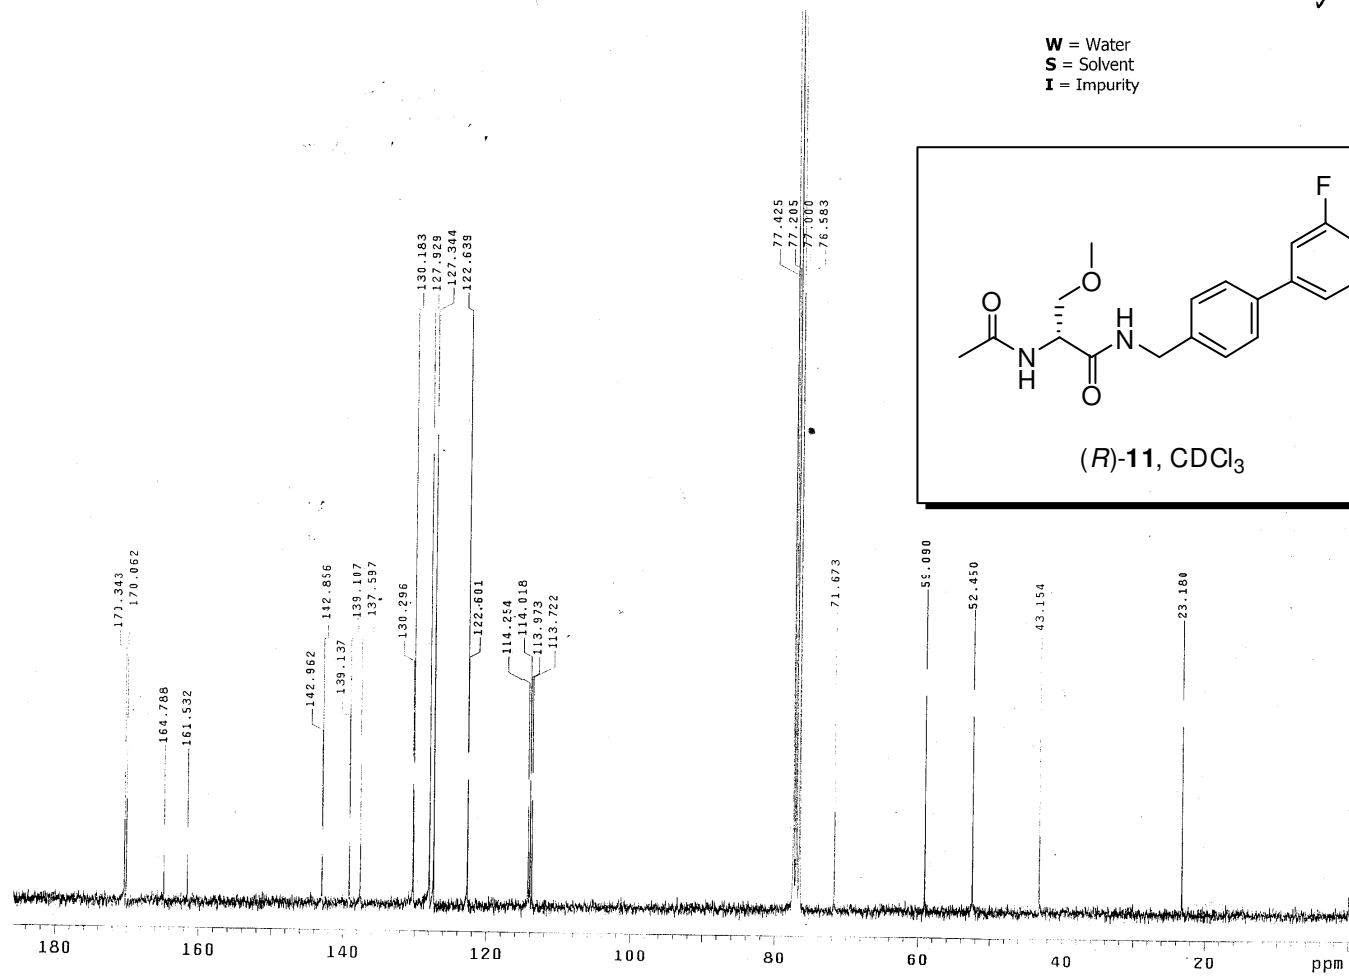

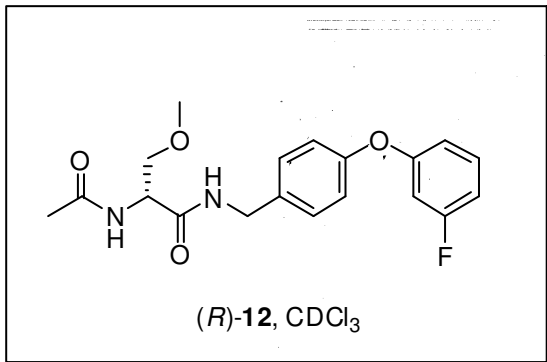

W = Water  
 S = Solvent  
 I = Impurity

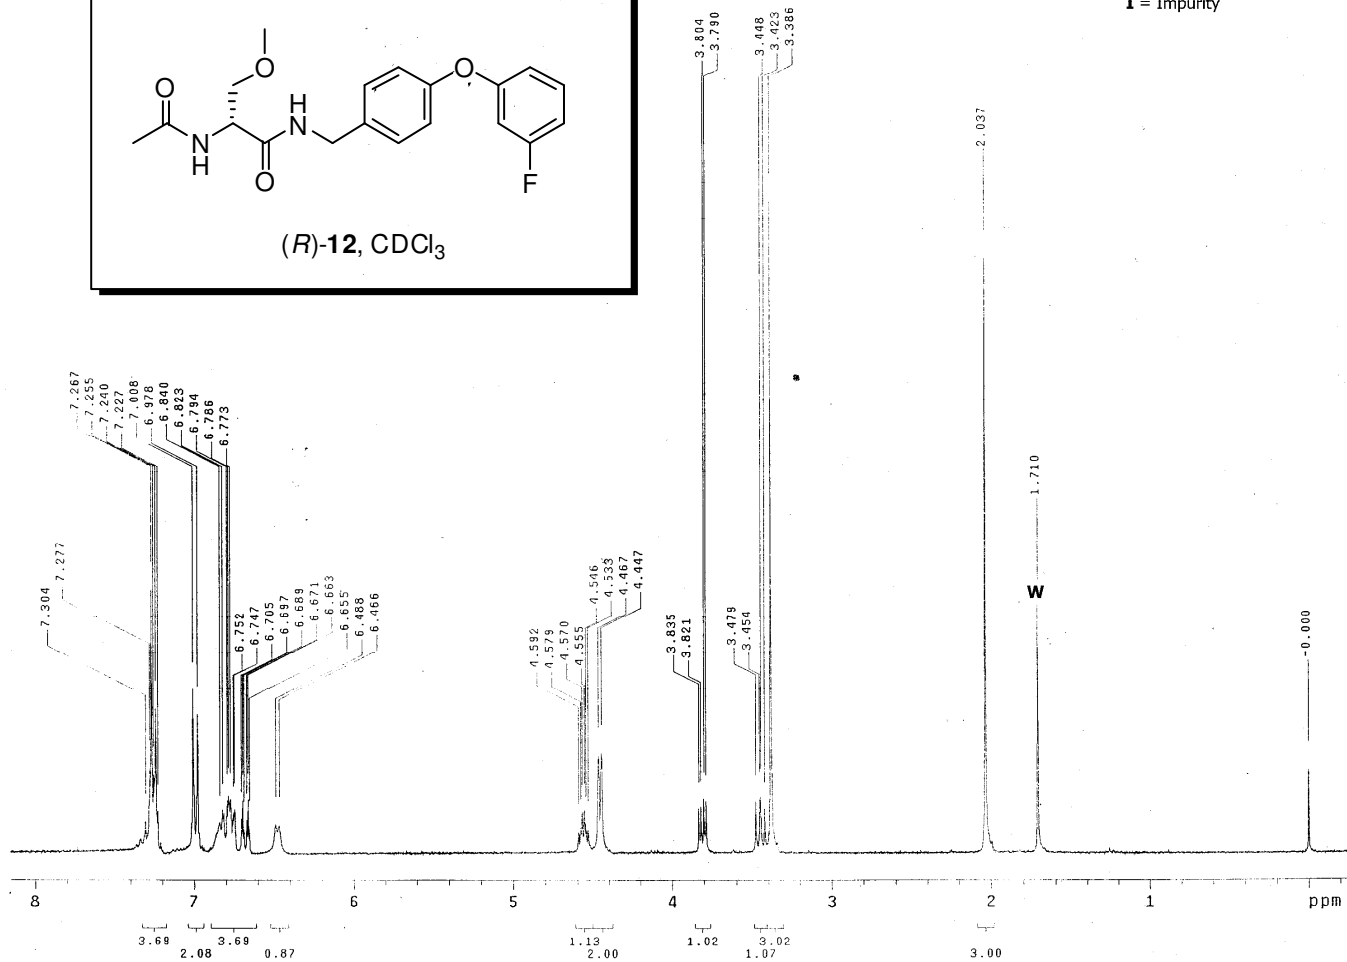

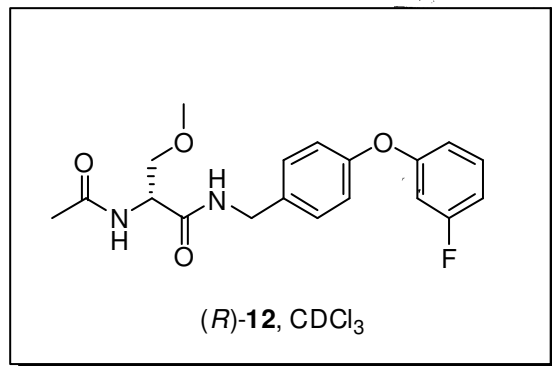

W = Water  
 S = Solvent  
 I = Impurity

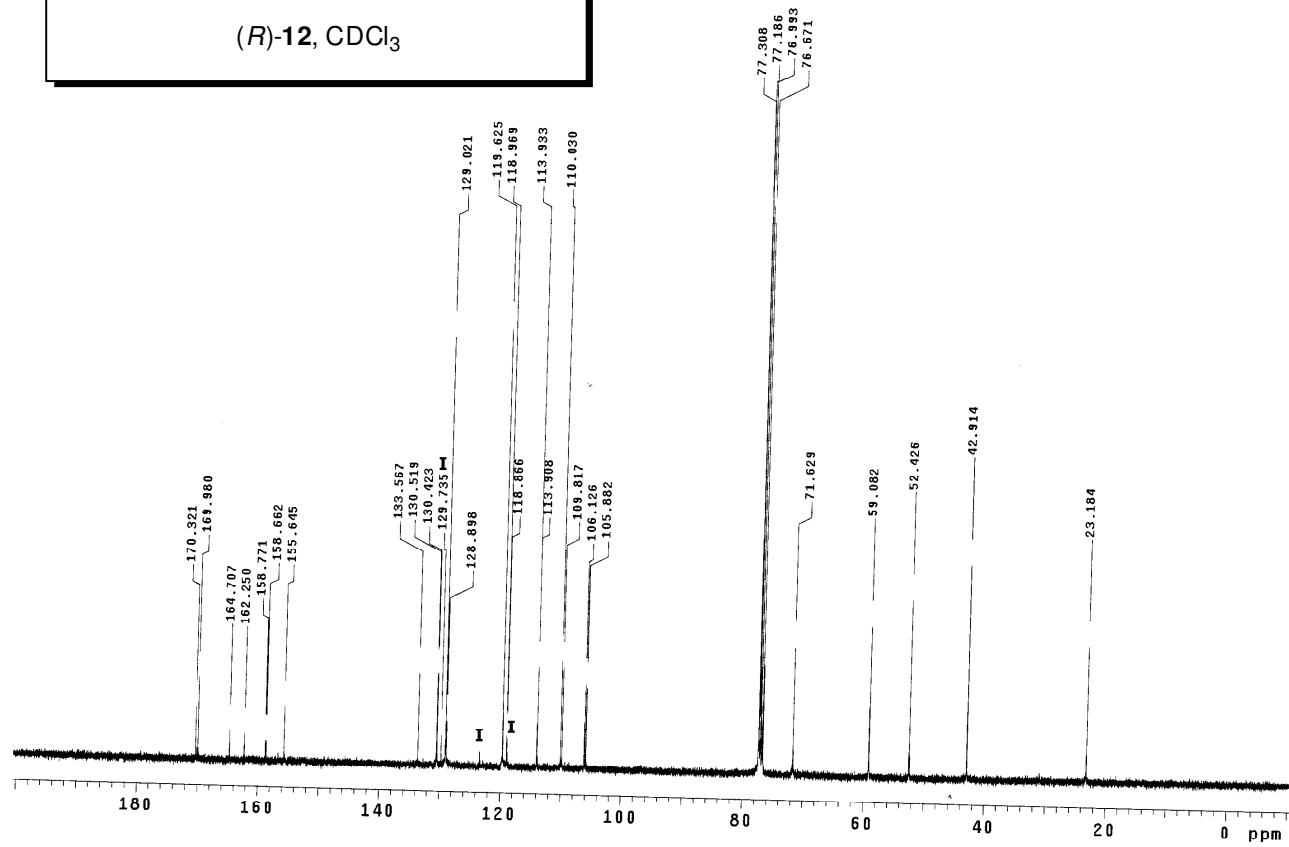

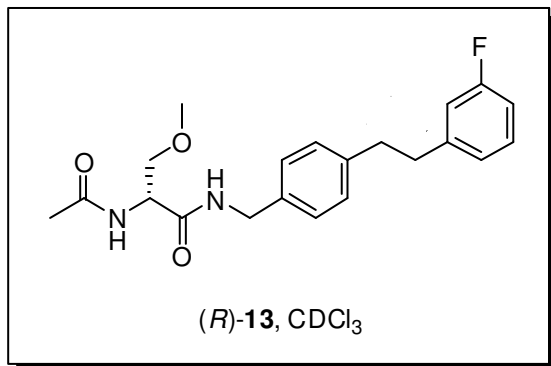

W = Water  
S = Solvent  
I = Impurity

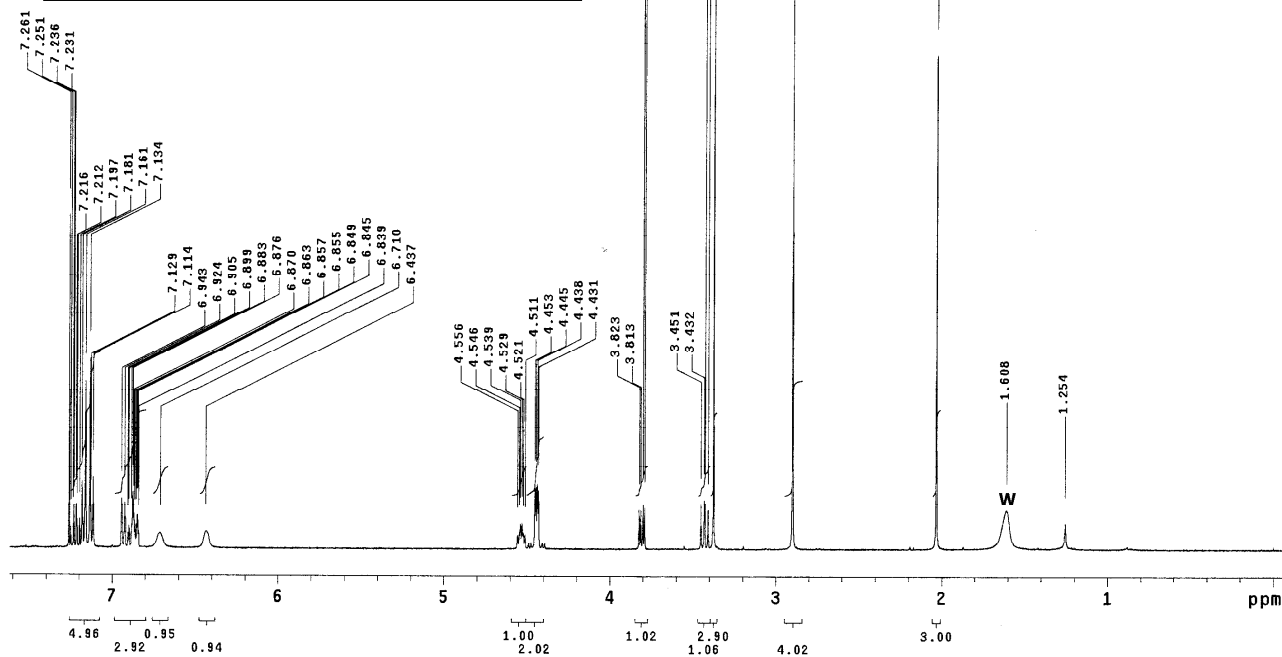

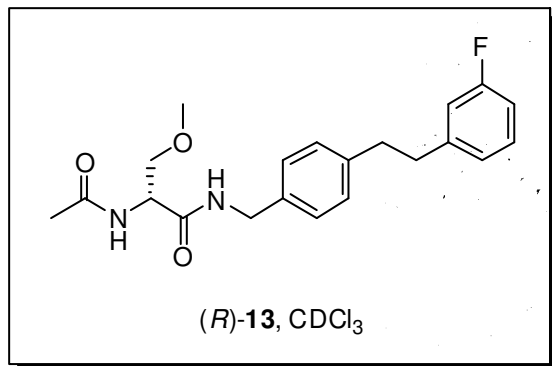

W = Water  
 S = Solvent  
 I = Impurity

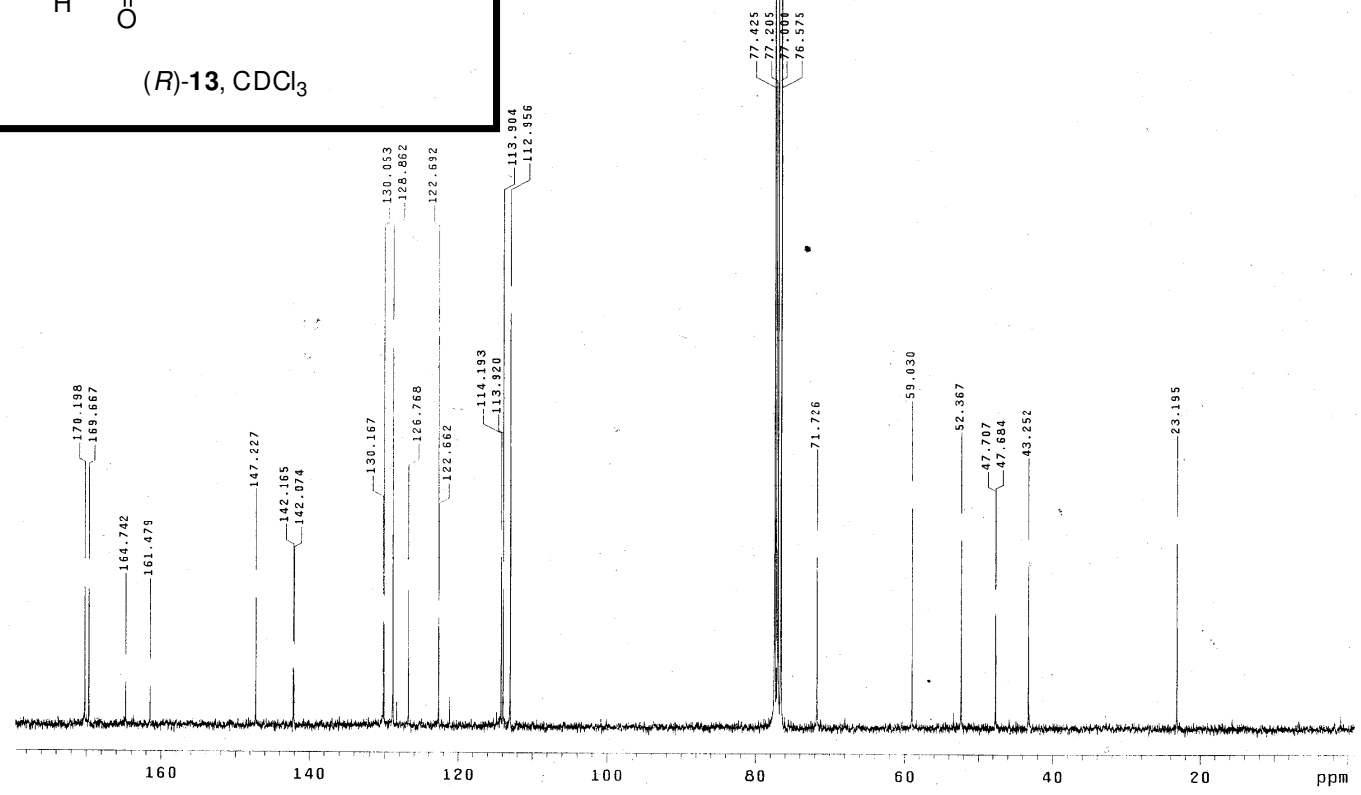

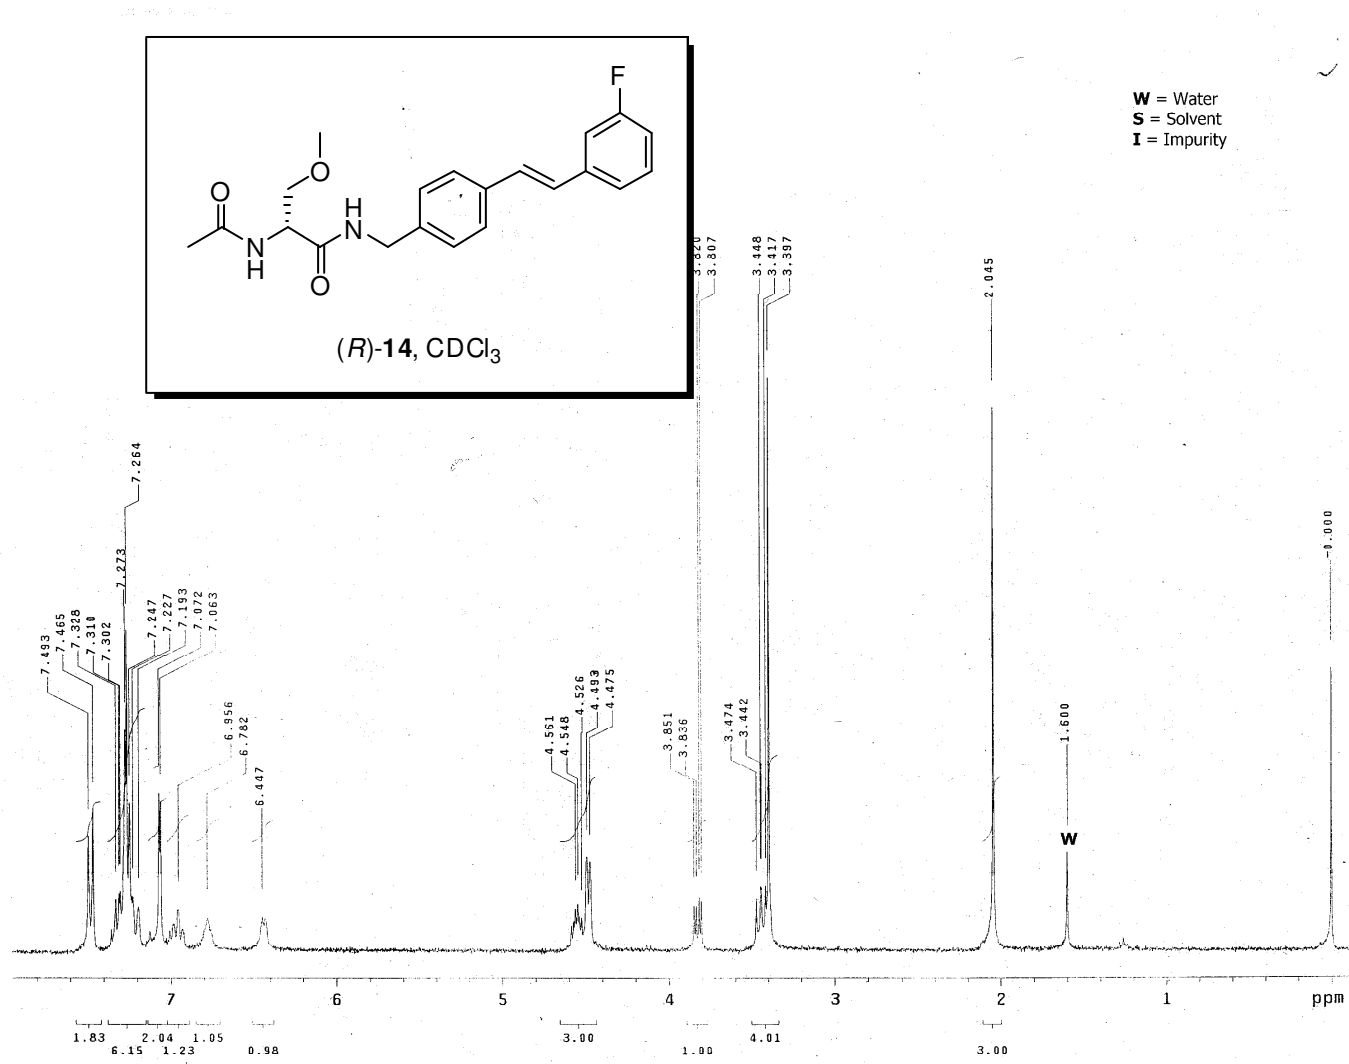

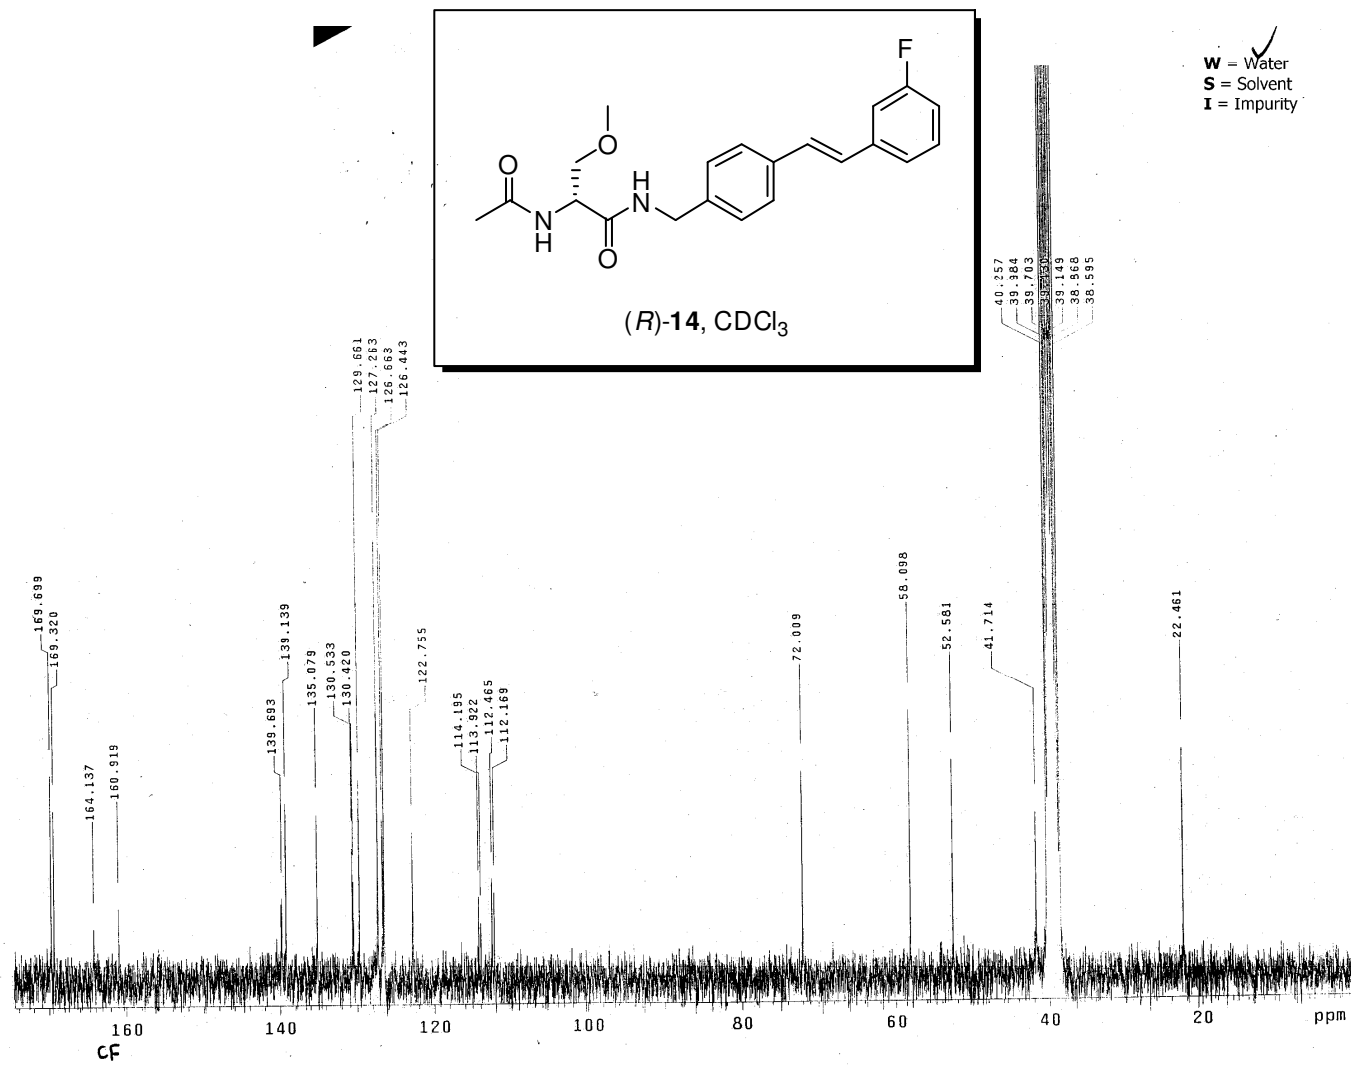



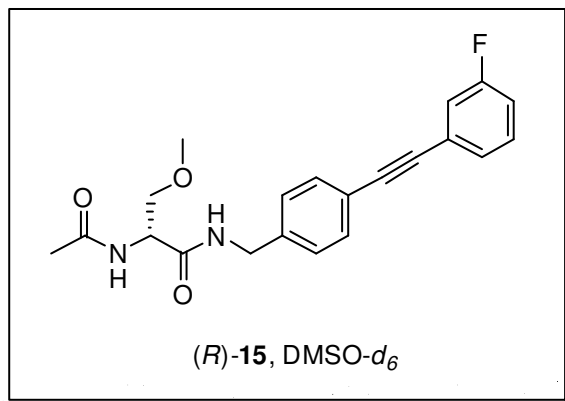

W = Water  
 S = Solvent  
 I = Impurity

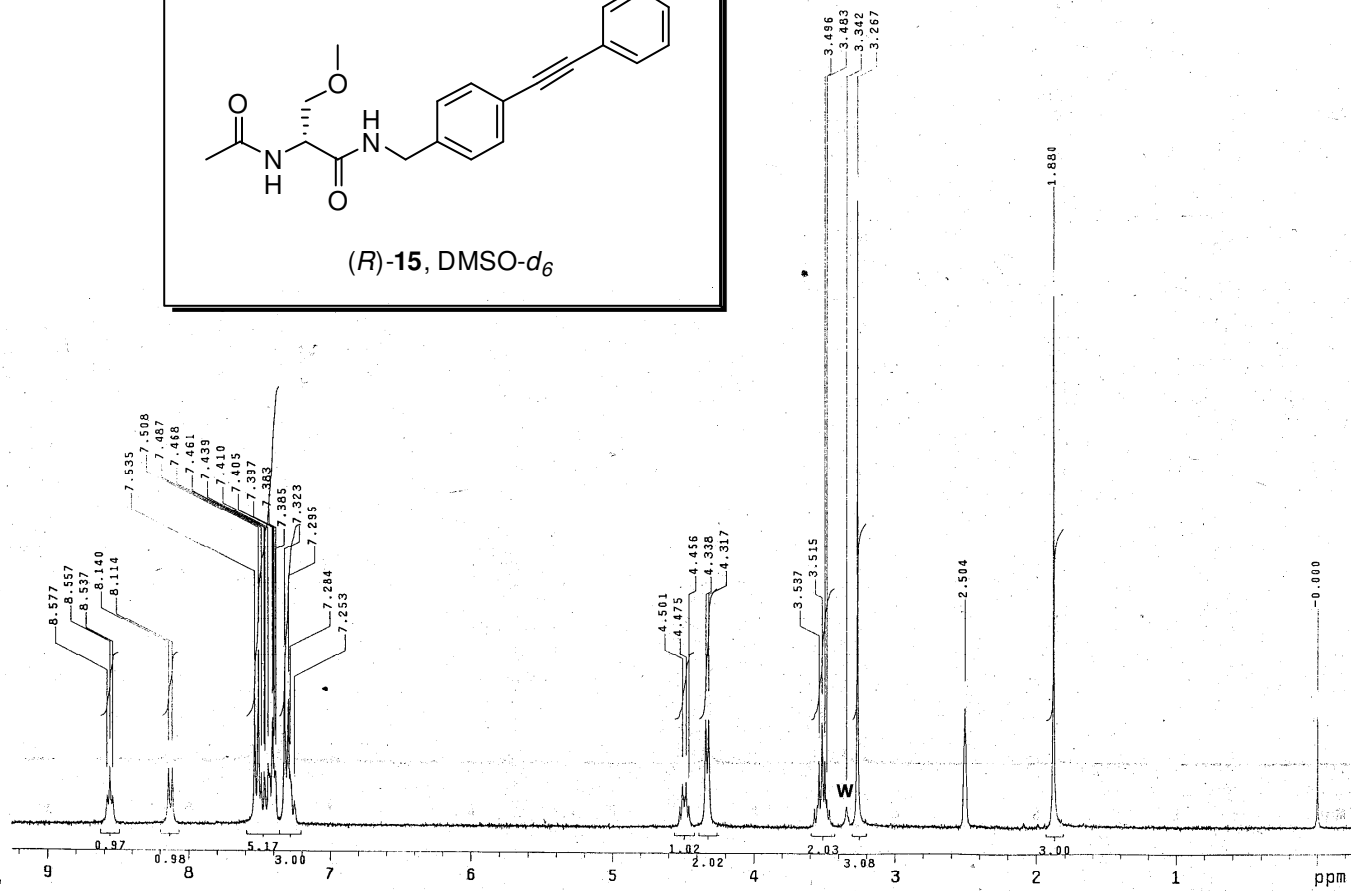

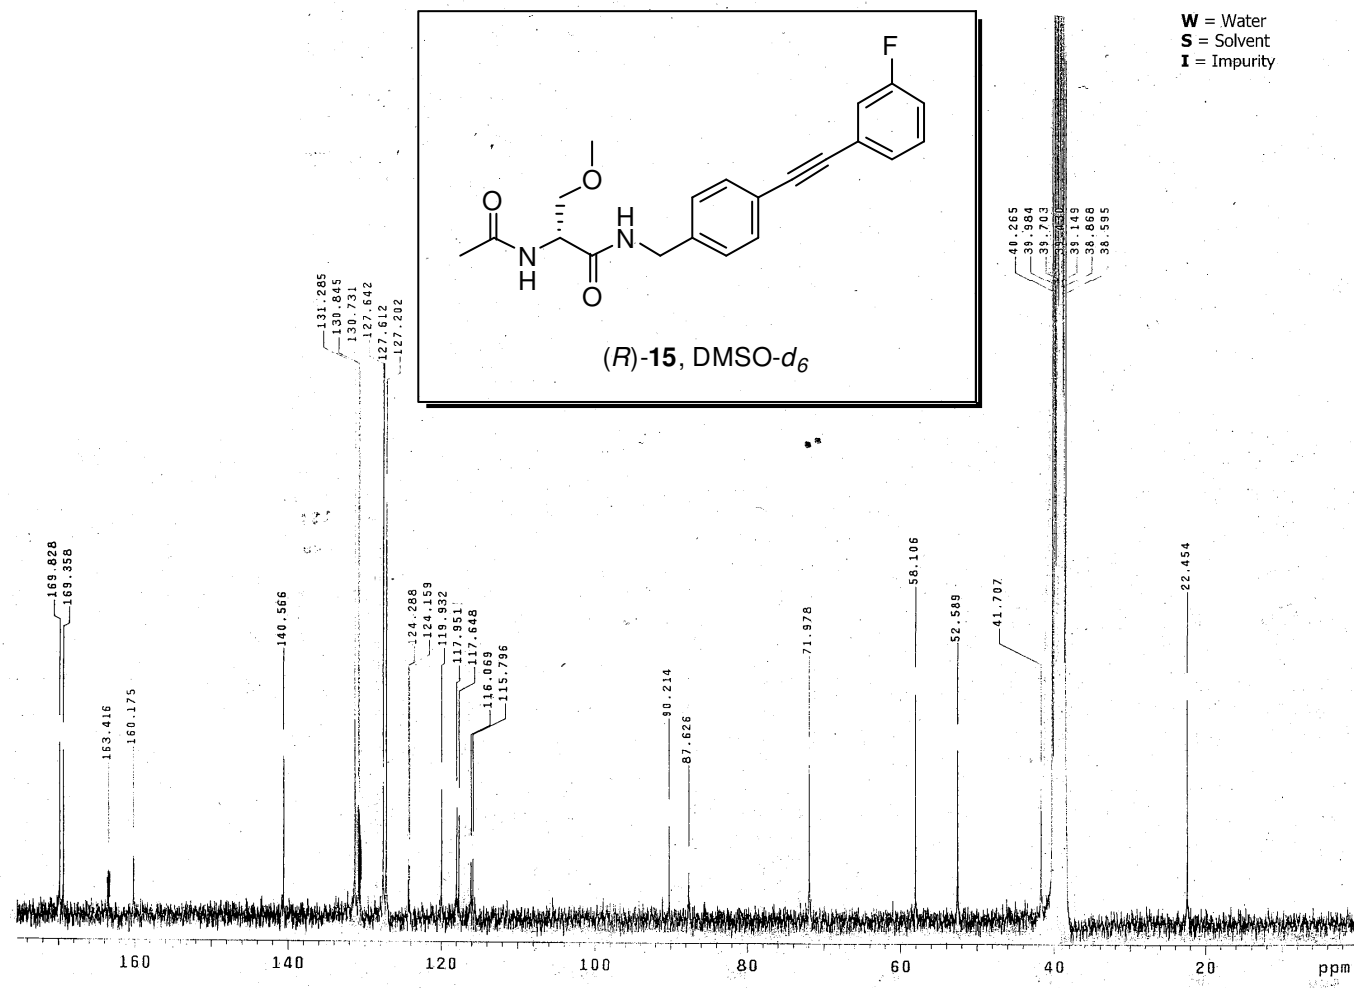

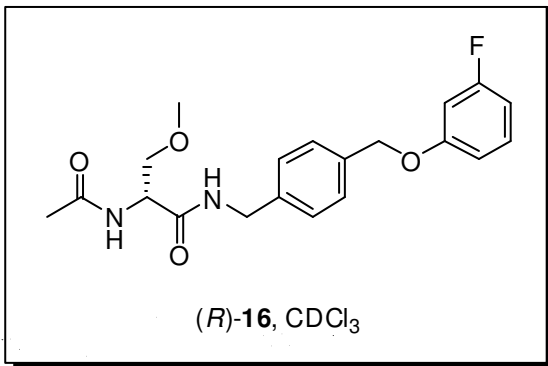

W = Water  
 S = Solvent  
 I = Impurity

Solvent: CDCl<sub>3</sub>  
 Ambient temperature  
 GEMINI-300 "ms6965"  
 PULSE SEQUENCE  
 Relax. delay 1.000 sec  
 Pulse 33.3 degrees  
 Acq. time 1.998 sec  
 Width 4500.5 Hz  
 16 repetitions  
 OBSERVE H1, 300.0608946 MHz  
 DATA PROCESSING  
 FT size 16384  
 Total time 0 min, 59 sec

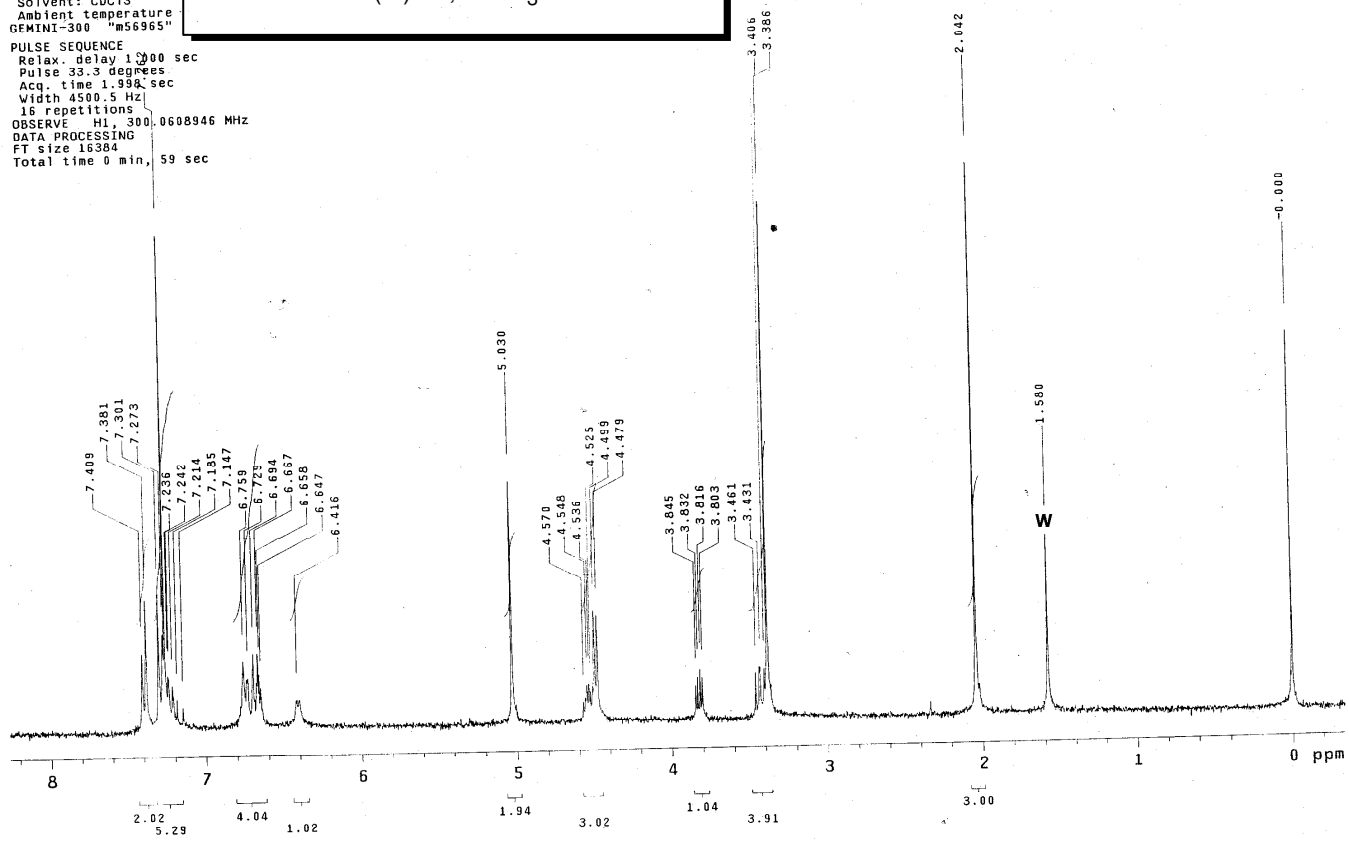

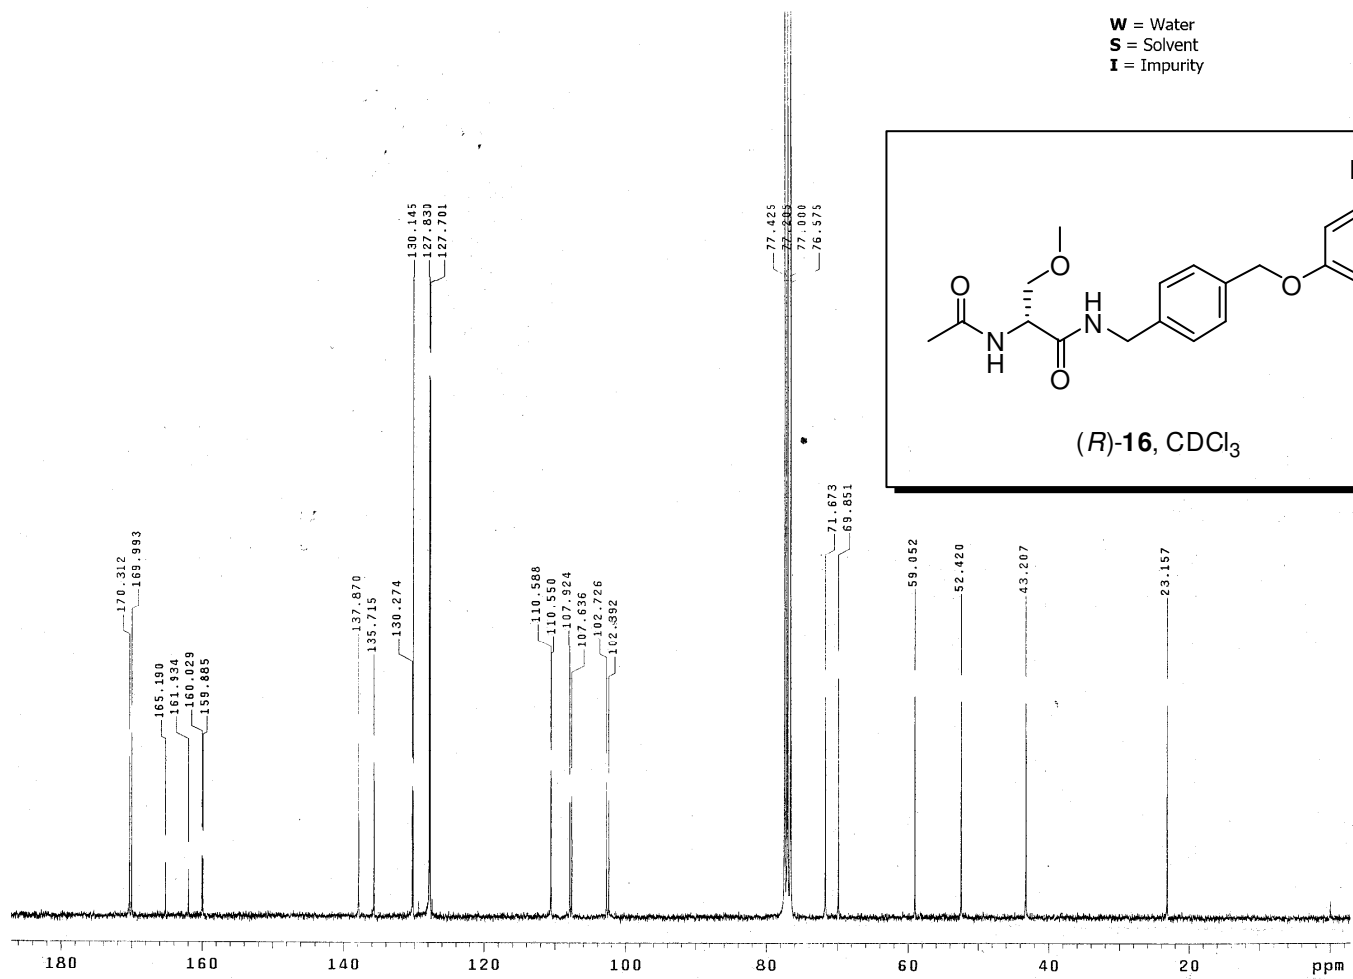

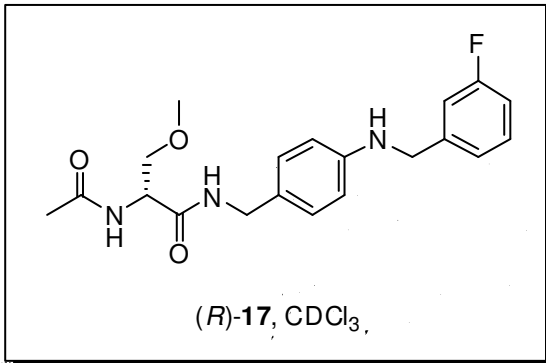

W = Water  
 S = Solvent  
 I = Impurity

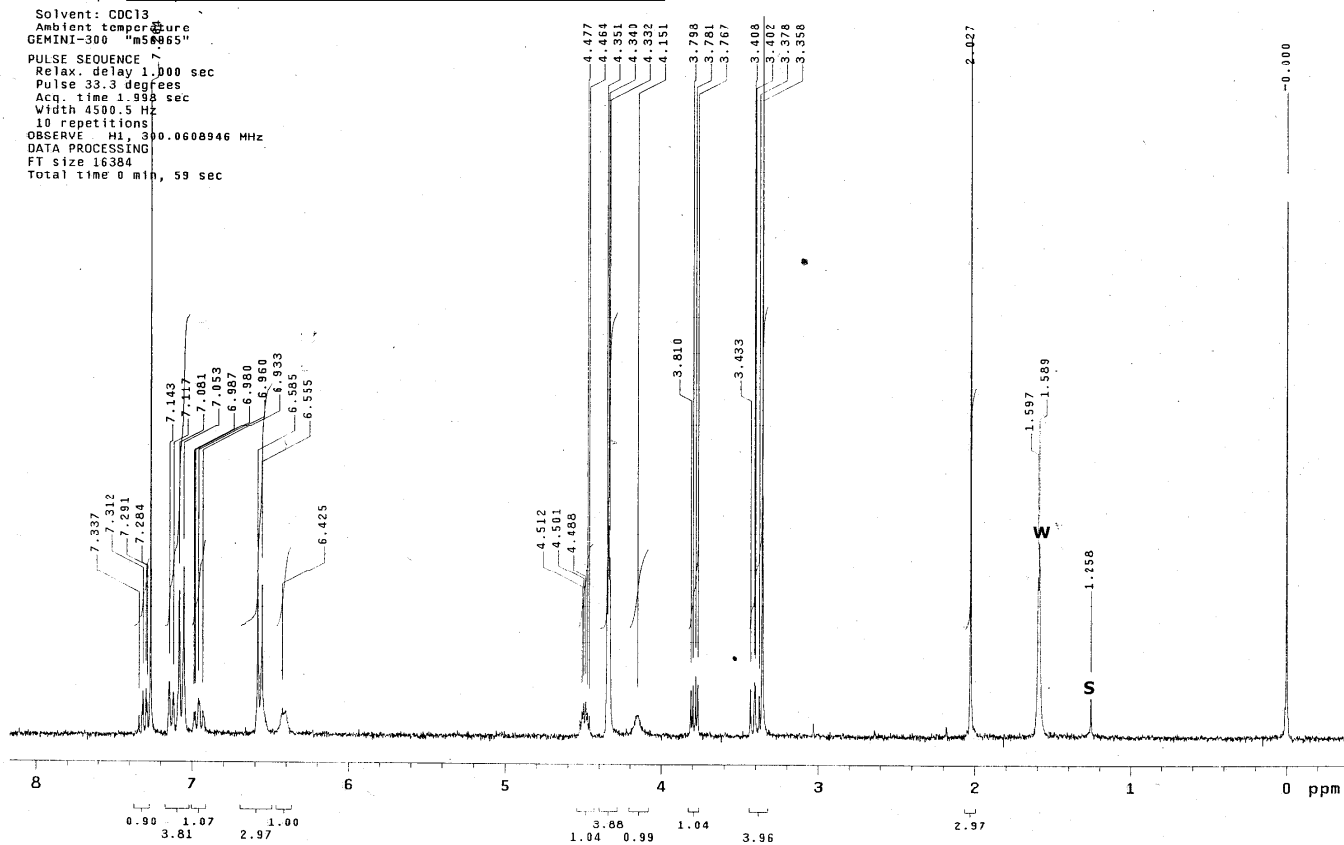

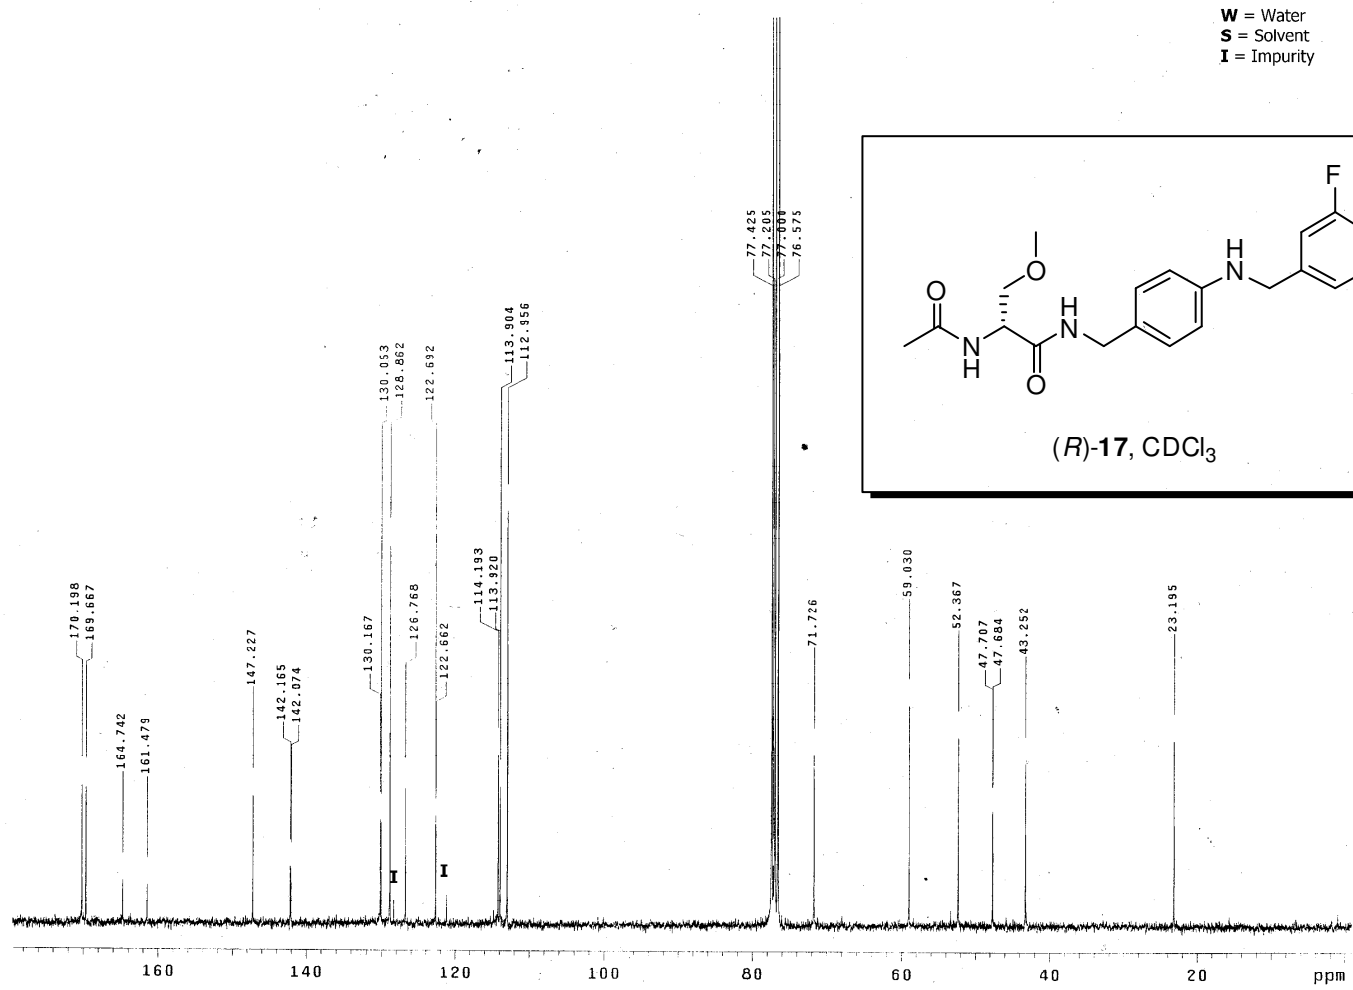

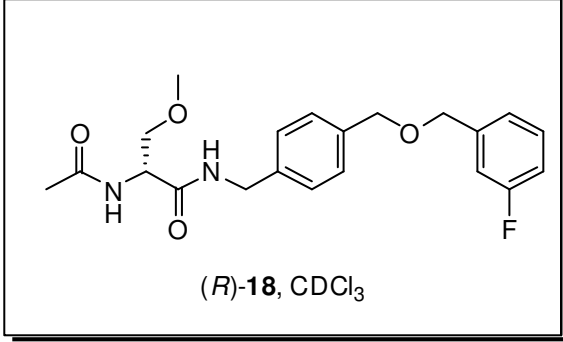

W = Water  
 S = Solvent  
 I = Impurity

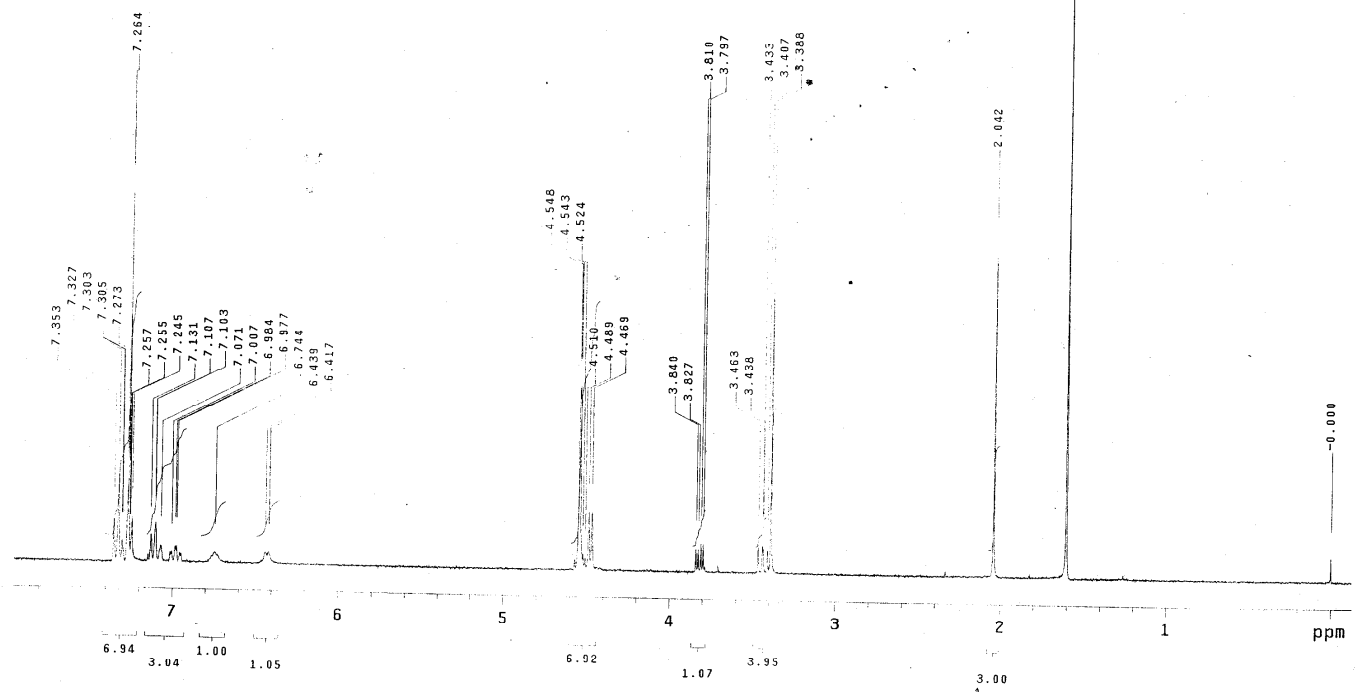

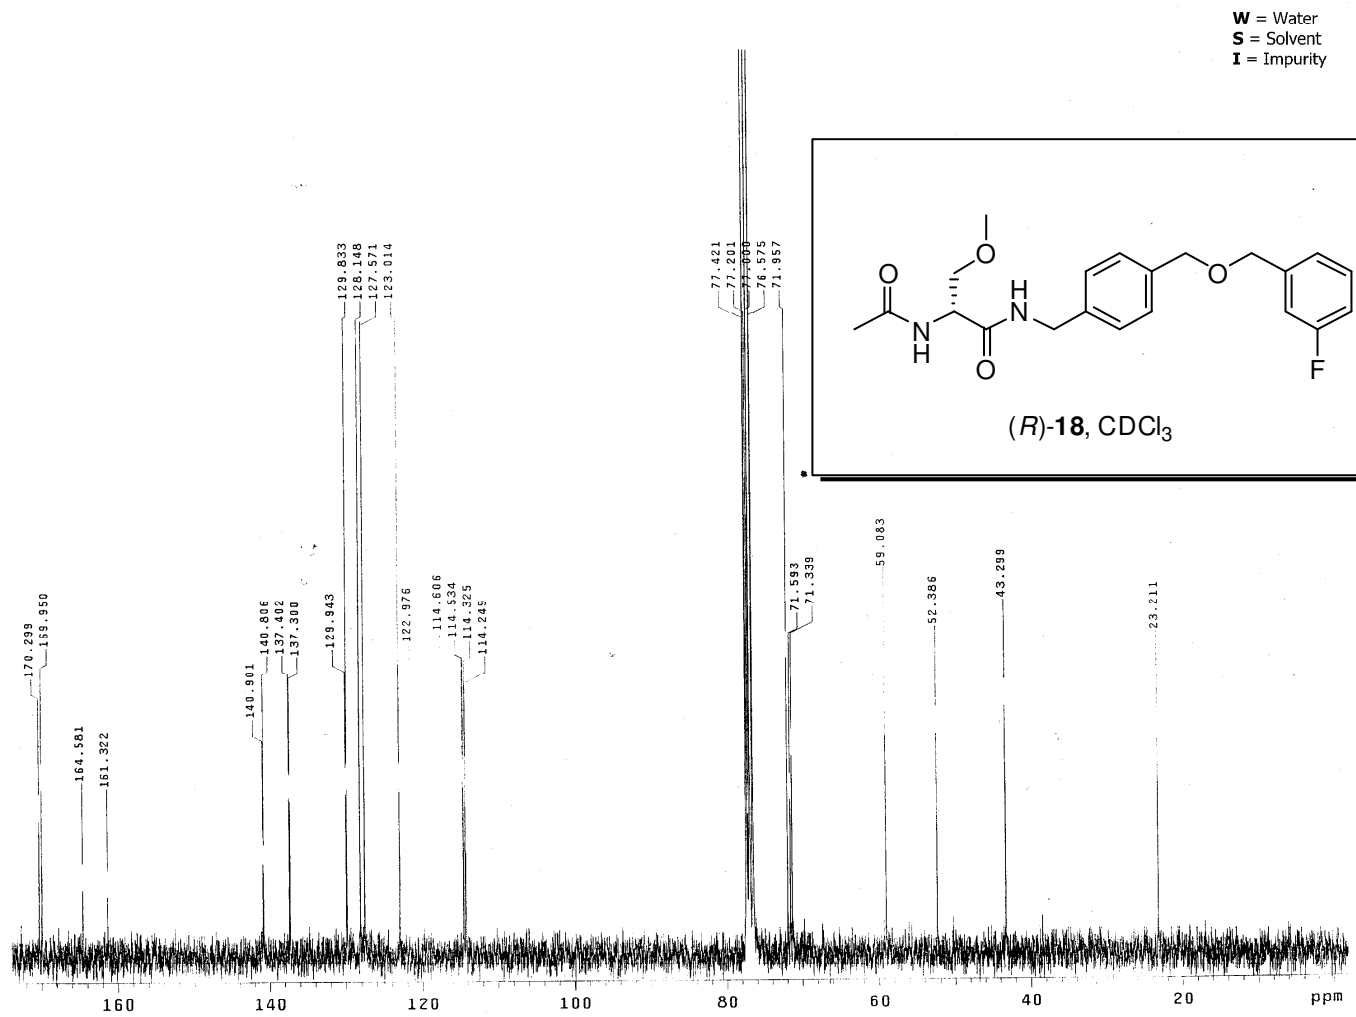



W = Water  
I = Impurity  
S = Solvent

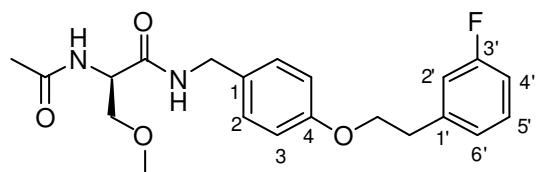

(R)-19, CDCl<sub>3</sub>

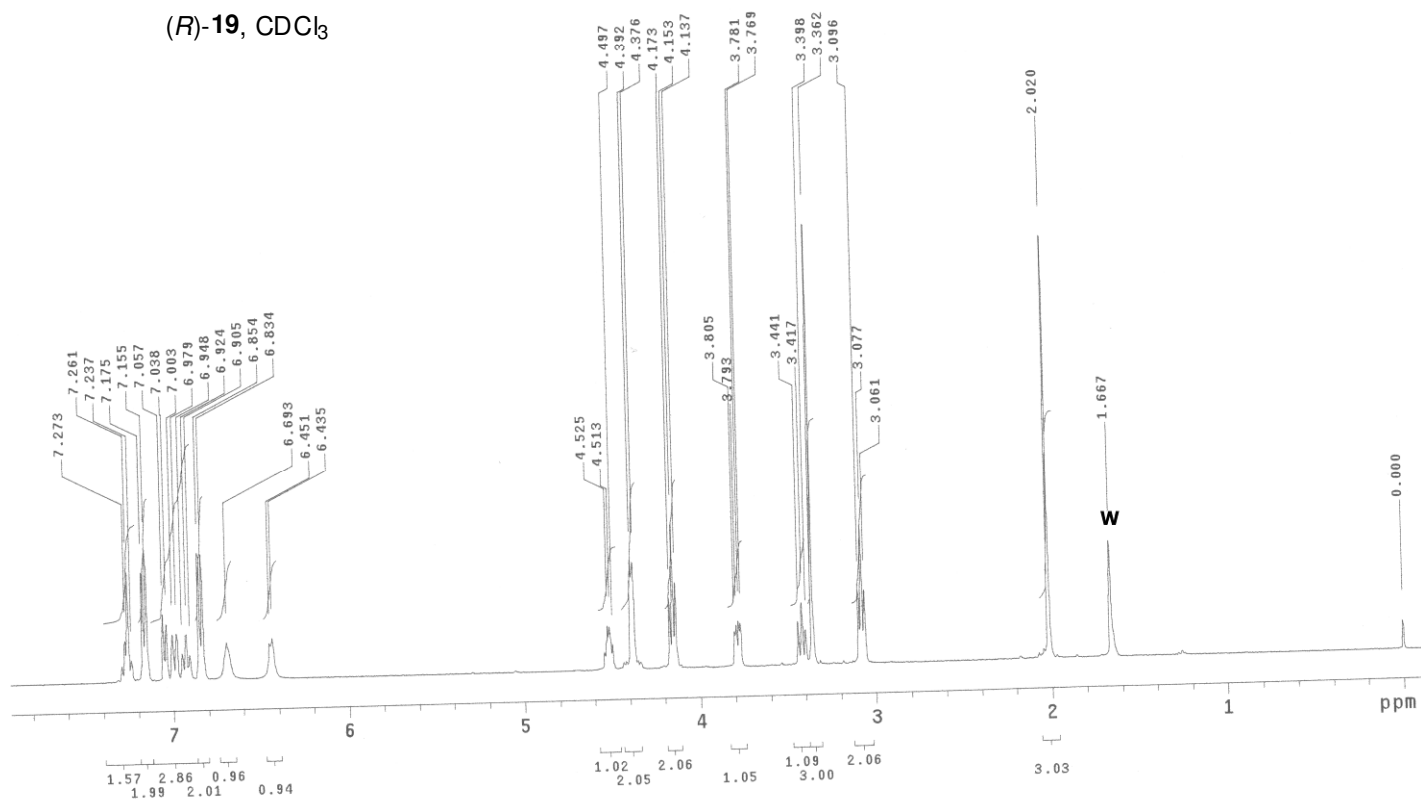

**W** = Water  
**I** = Impurity  
**S** = Solvent

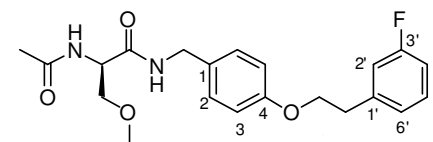

(R)-19, CDC<sub>b</sub>

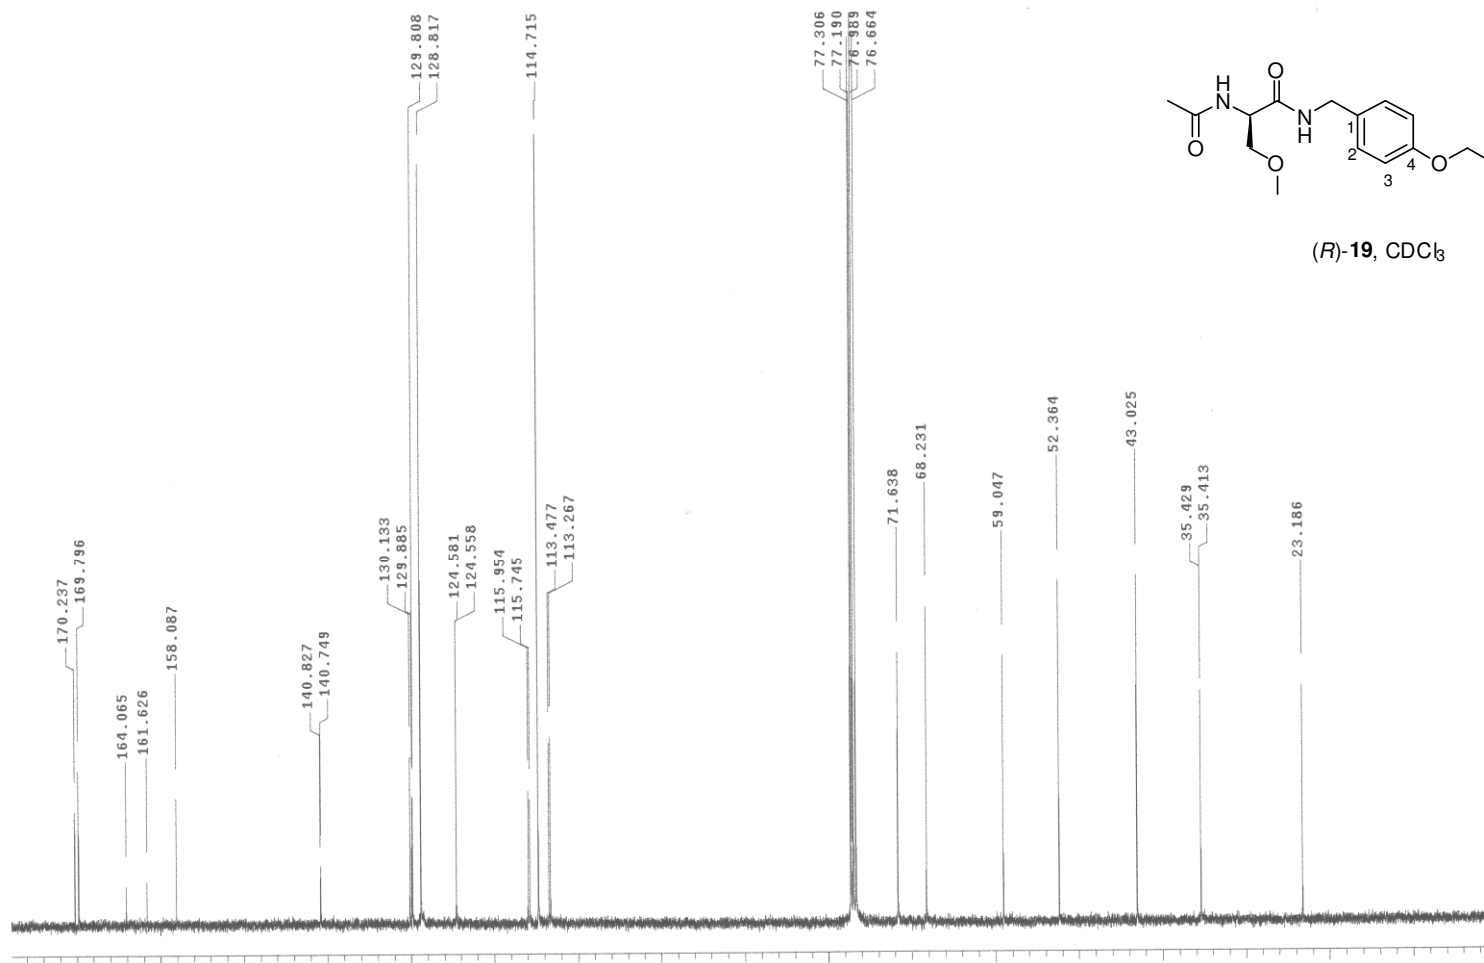

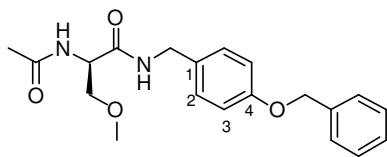

(*R*)-20, CDCl<sub>3</sub>

W = Water  
 I = Impurity  
 S = Solvent

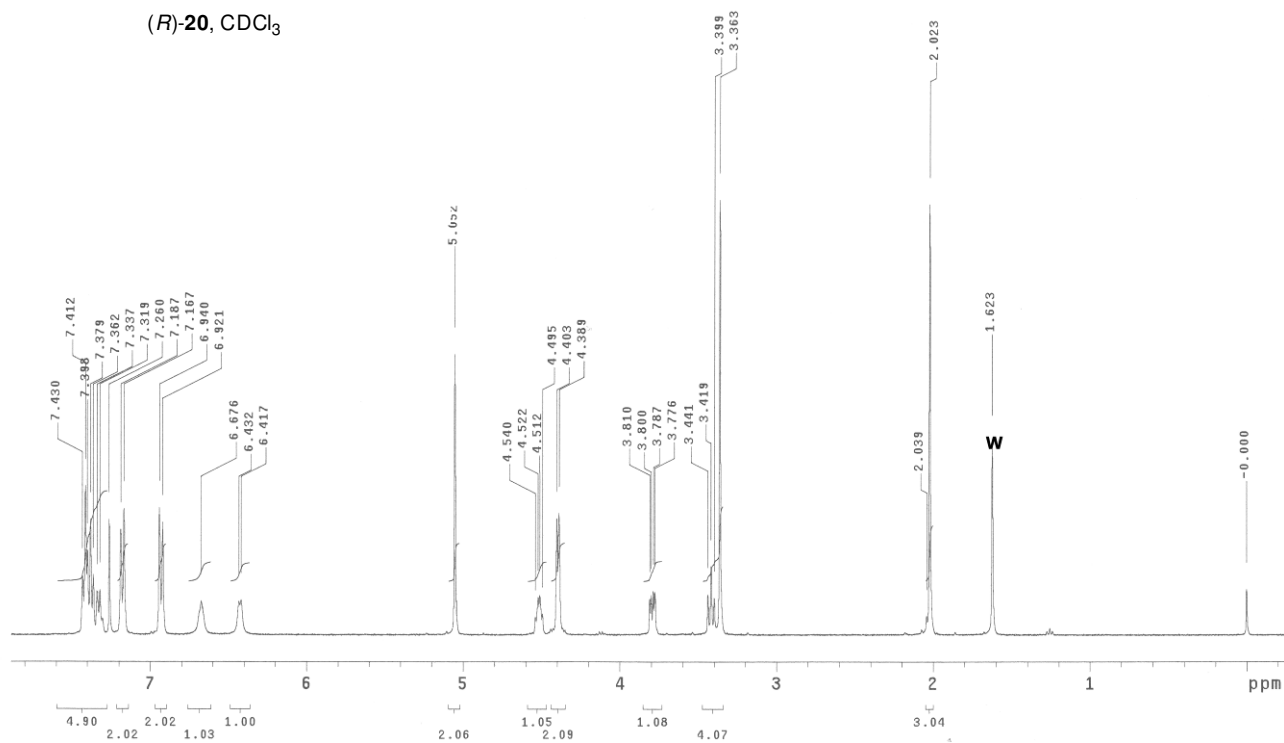

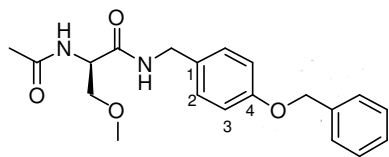

(R)-20, CDCl<sub>3</sub>

W = Water  
I = Impurity  
S = Solvent

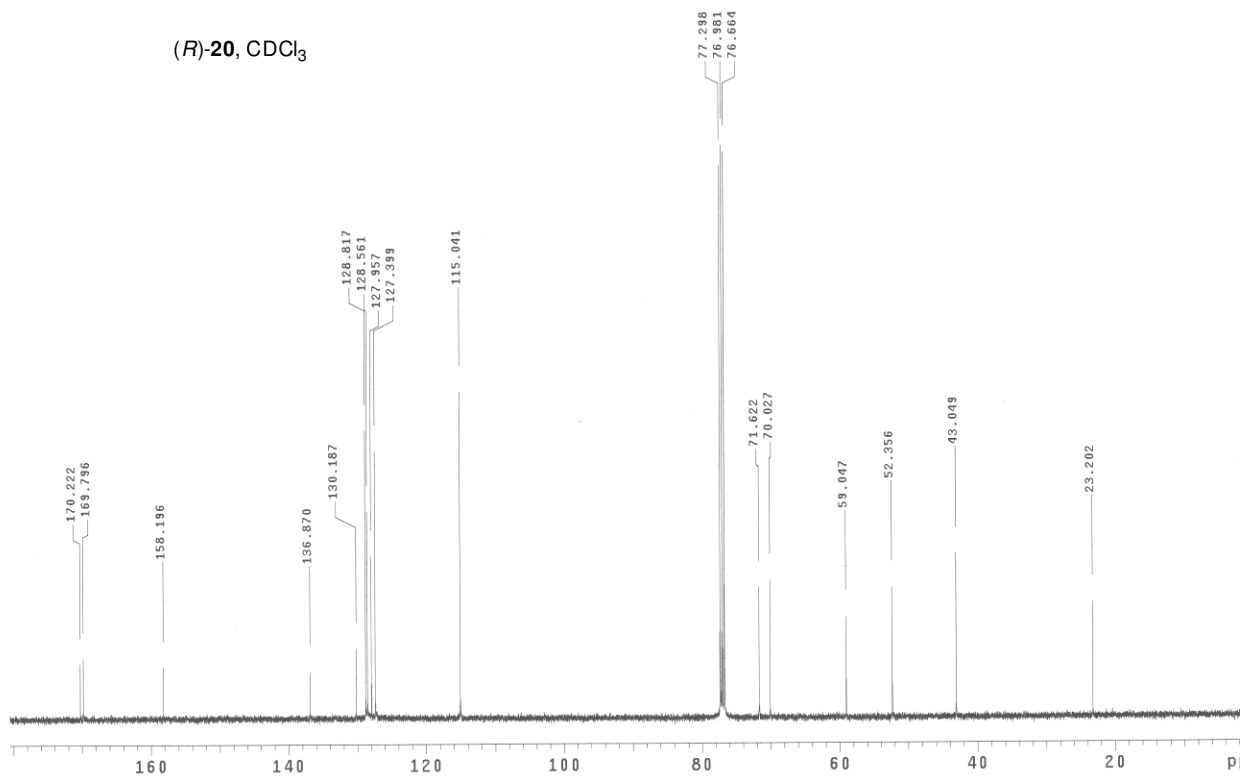

Pulse Sequence: PROTON (s2pu1)  
 Solvent: CDCl3  
 Data collection: 13C  
 Temp: 29.0 °C  
 Sample #4 Operator: csalome  
 Relax. delay: 1.000 sec  
 Pulse: 45.0 degrees  
 Acq. time: 3.408 sec  
 Width: 4877.712  
 8 repetitions  
 OBSERVE: H1 299.8346702 MHz  
 DATA PROCESSING: No  
 FT size: 1.384  
 Total time: 0 min 36 sec

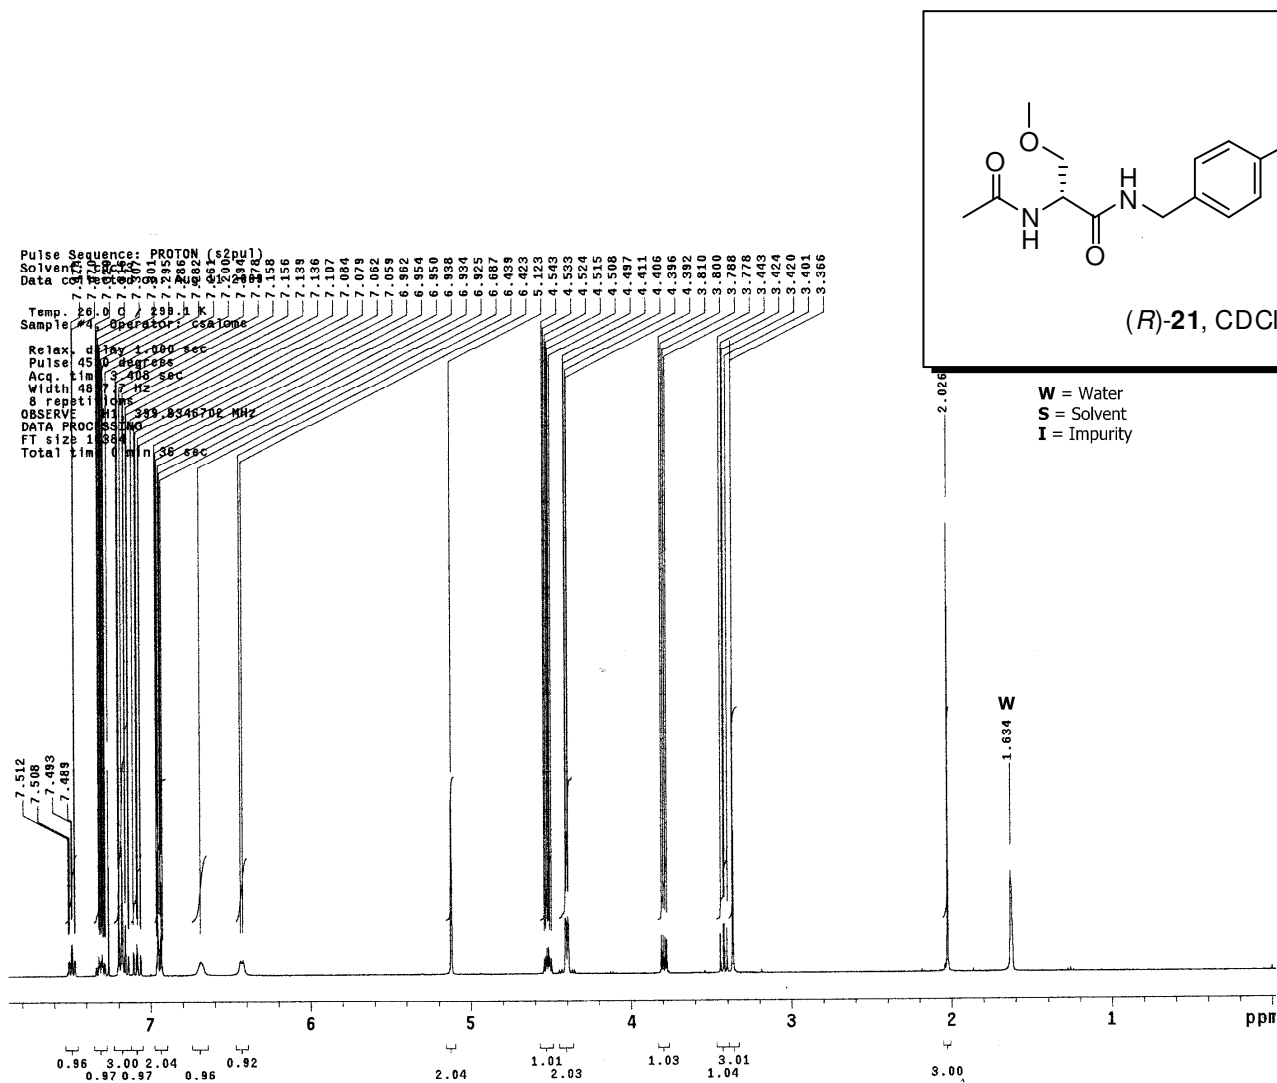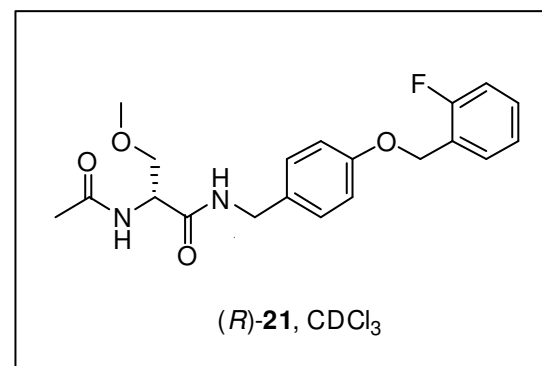

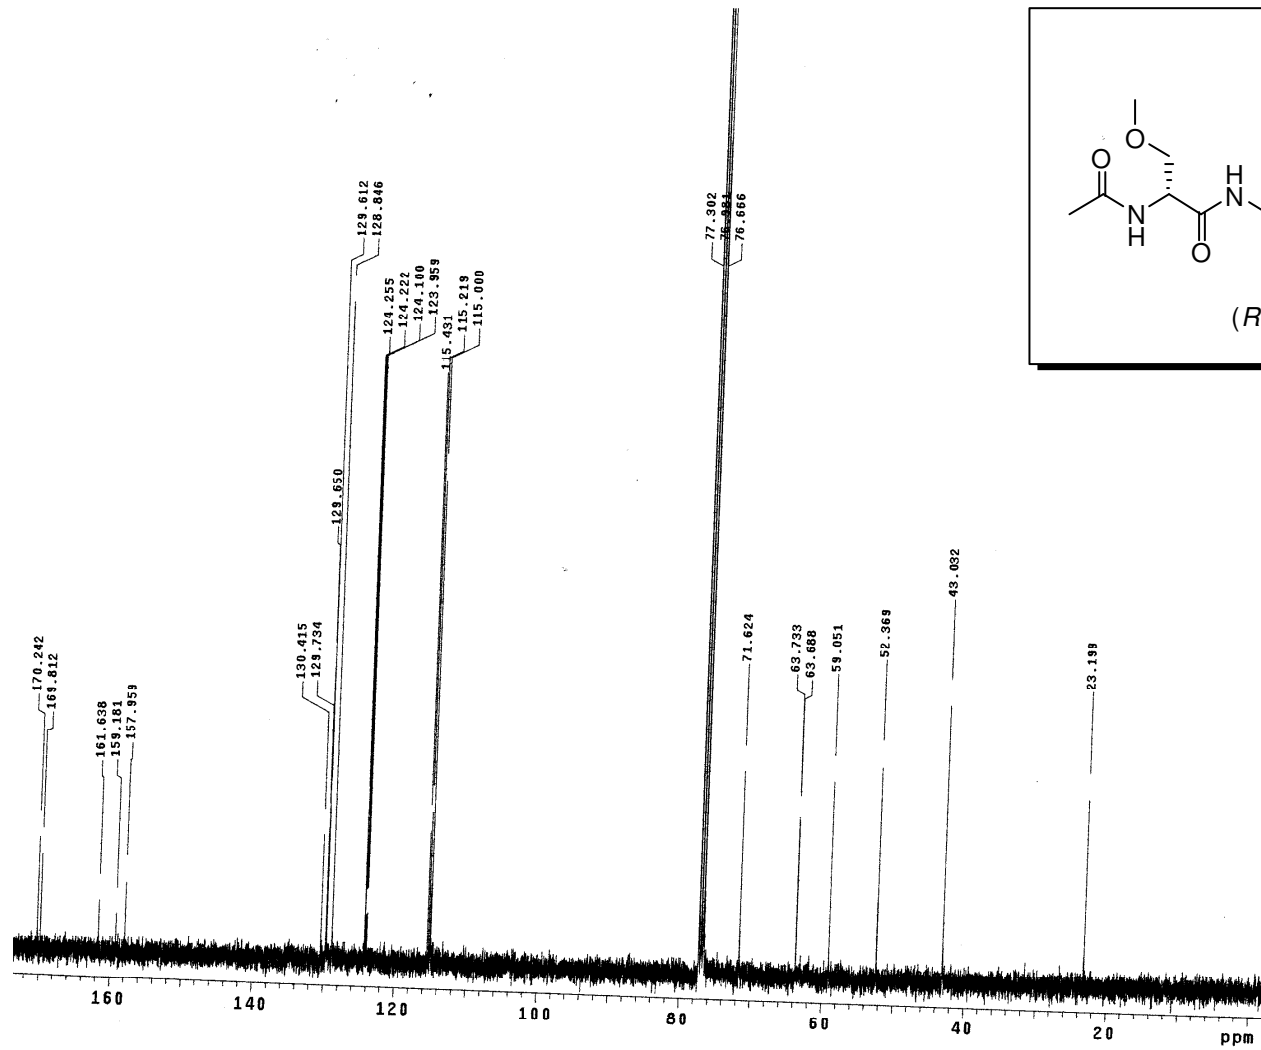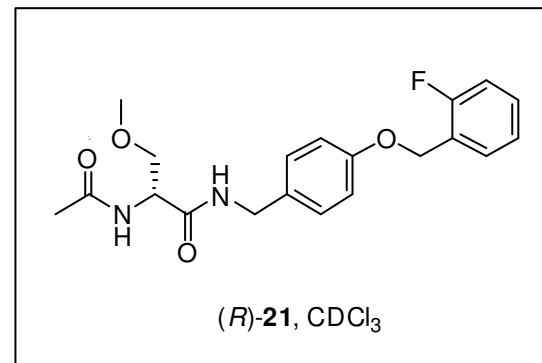

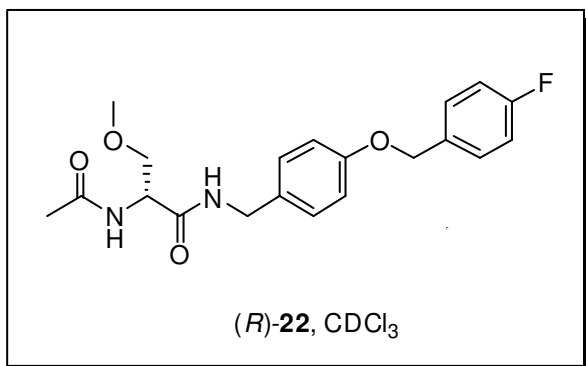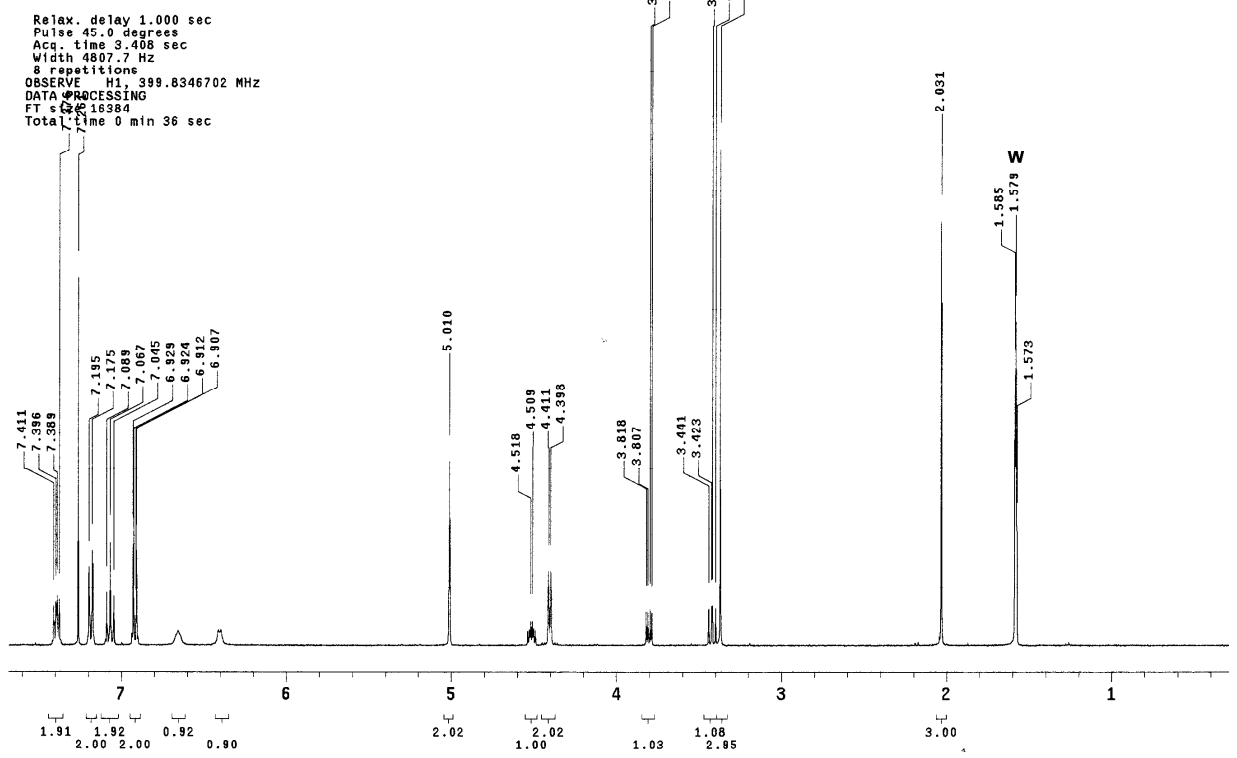

W  
S  
I

W = Water  
S = Solvent  
I = Impurity

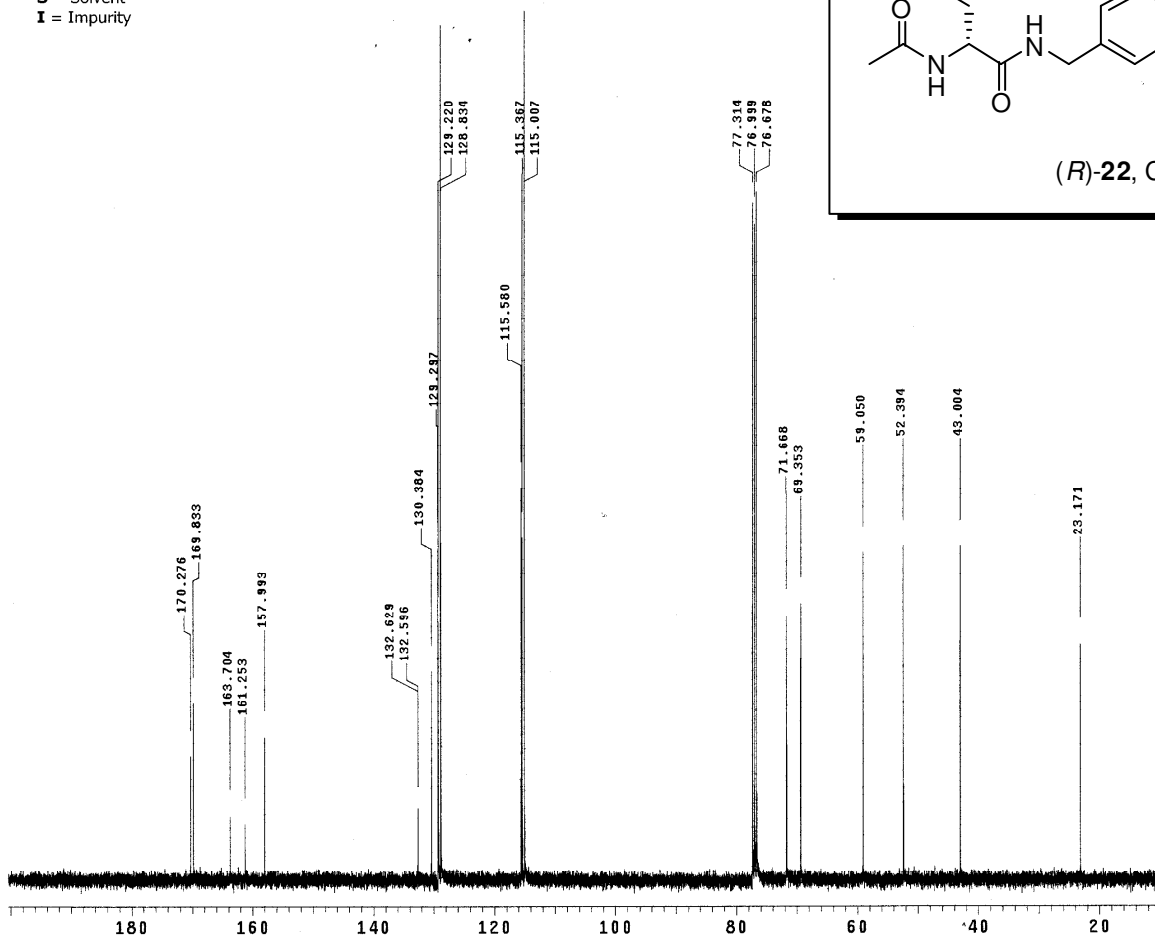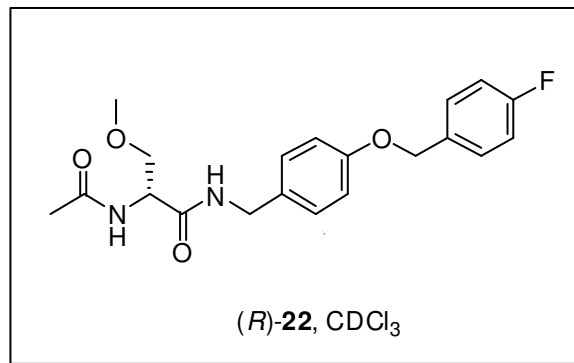



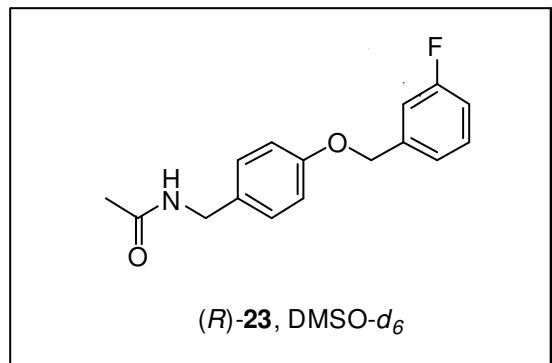

W = Water  
 S = Solvent  
 I = Impurity

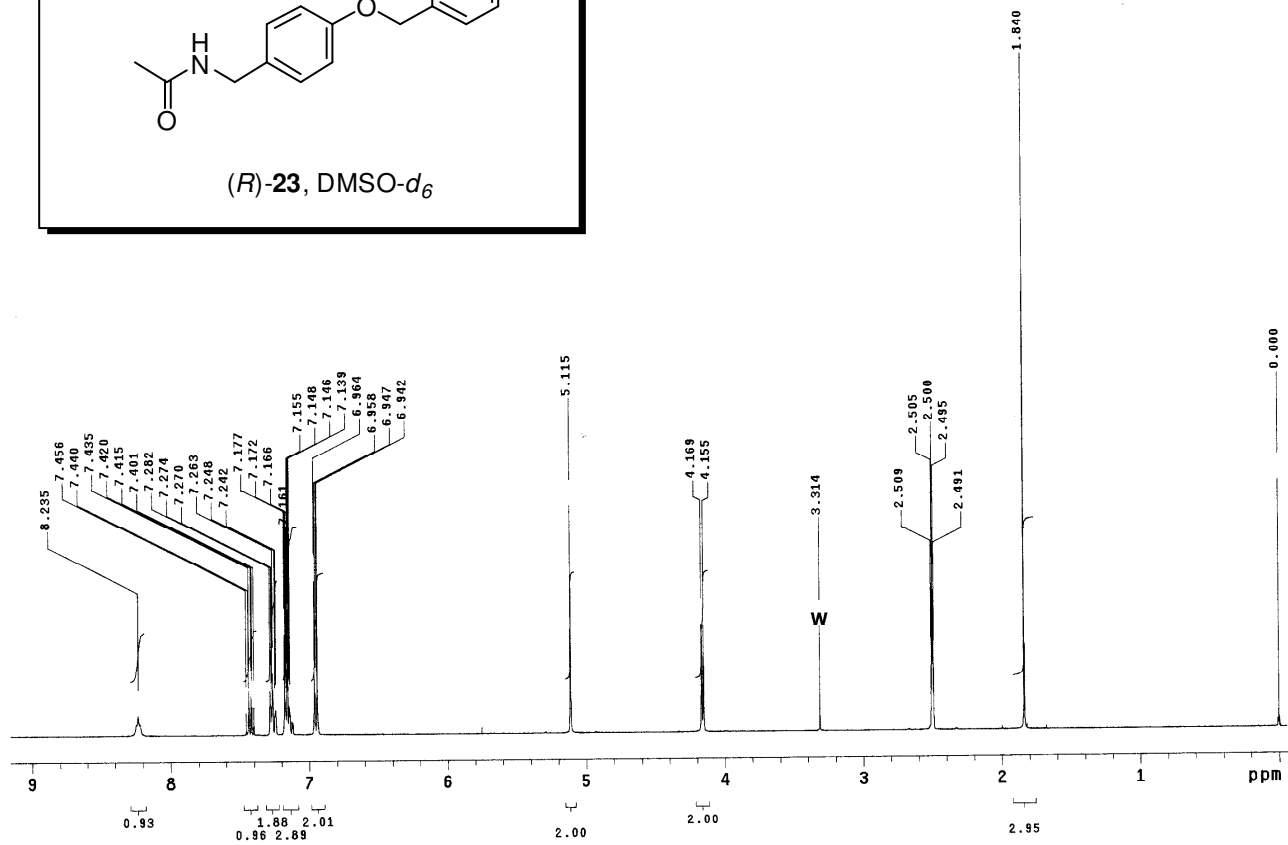

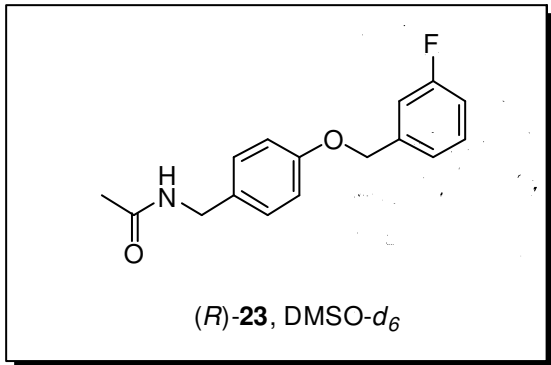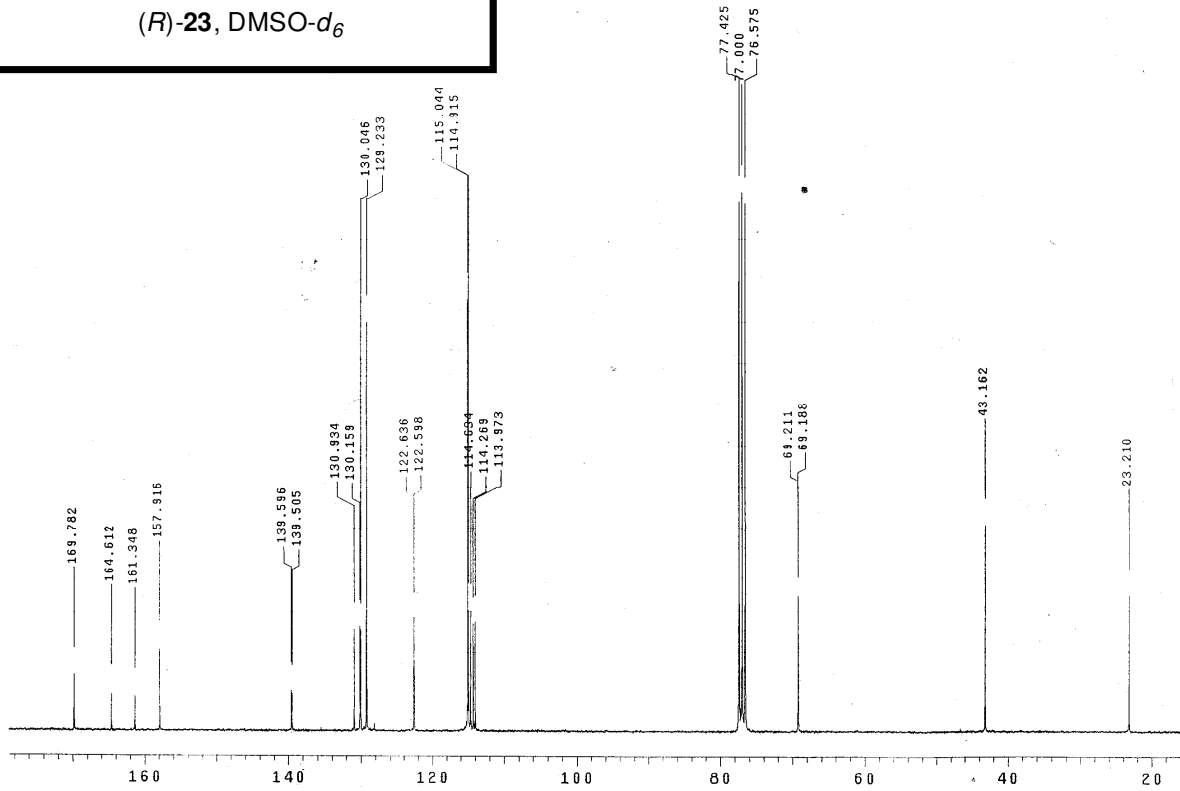

W  
S  
I

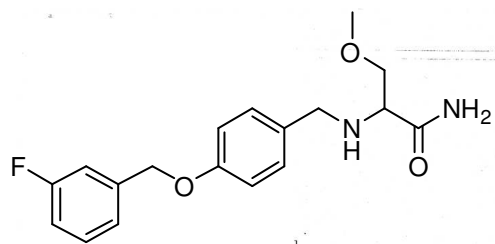

W =  
S =  
I =

74, CDCl<sub>3</sub>

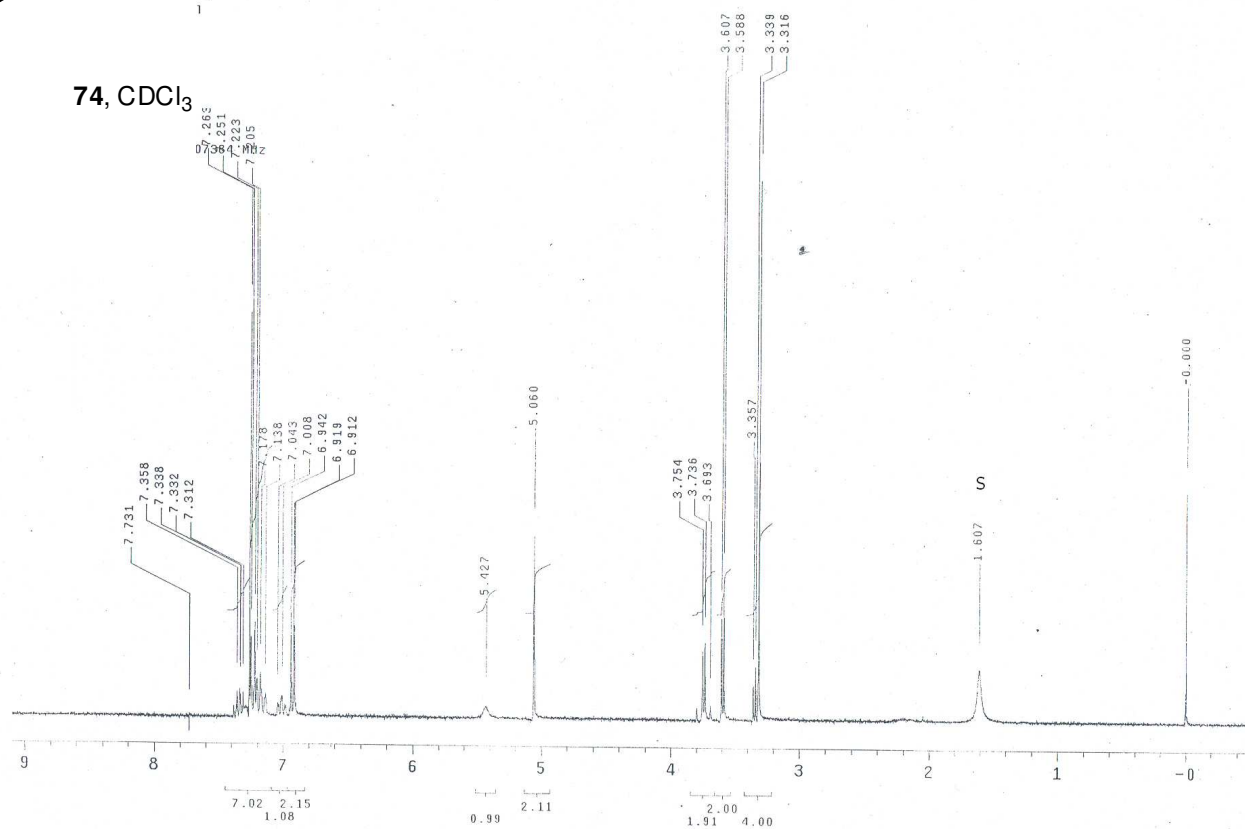

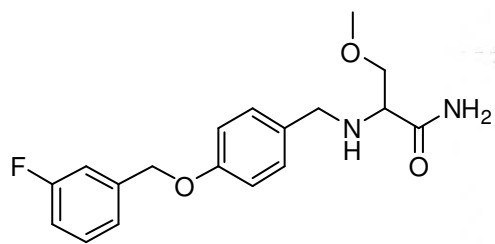

74, CDCl<sub>3</sub>

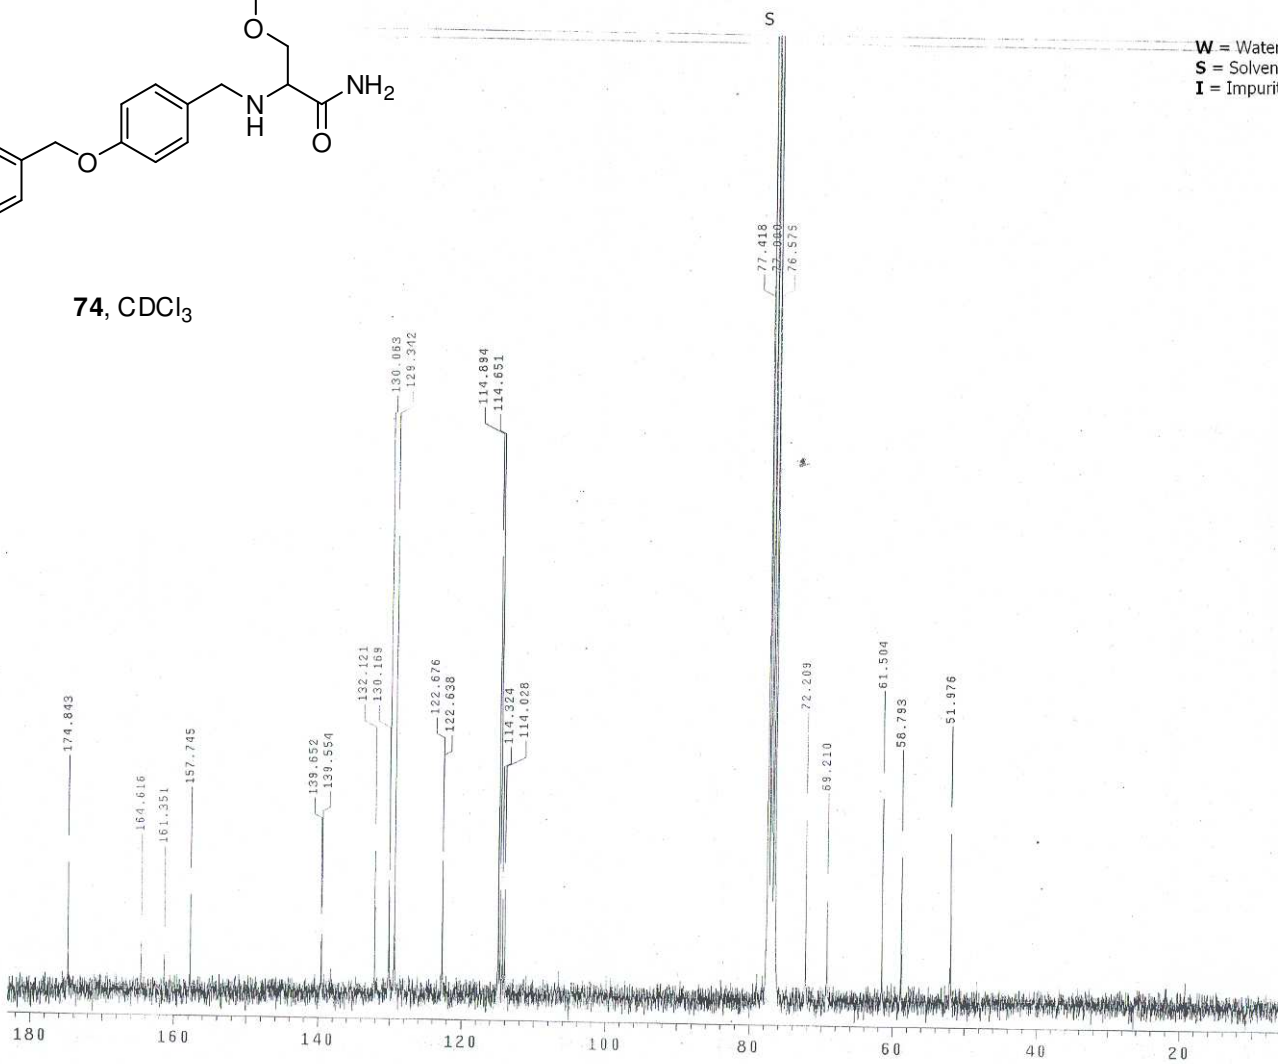

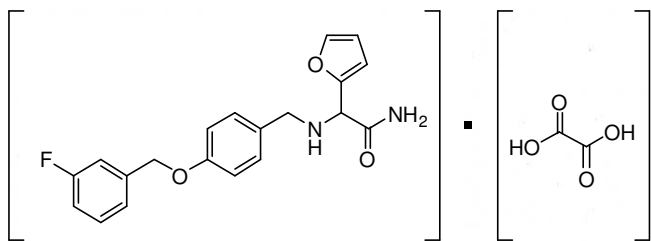

75, DMSO-*d*<sub>6</sub>

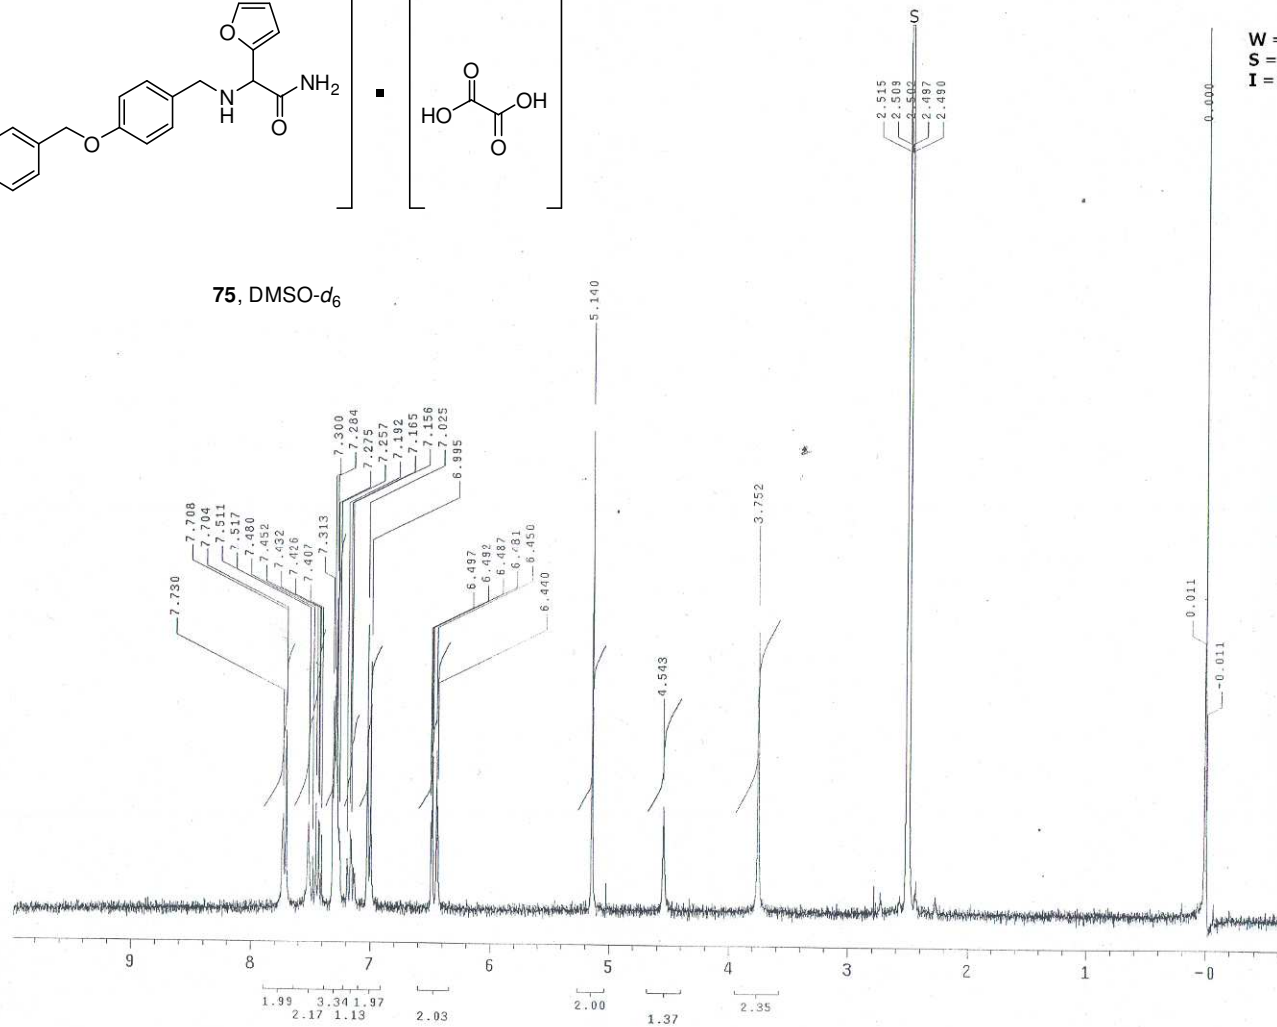

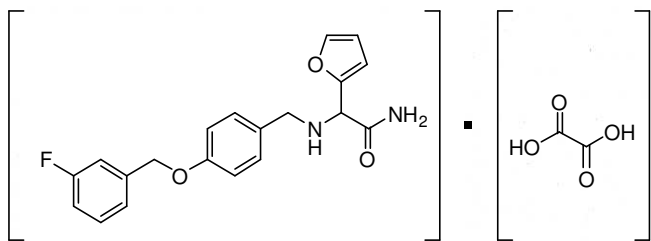

75, DMSO-*d*<sub>6</sub>

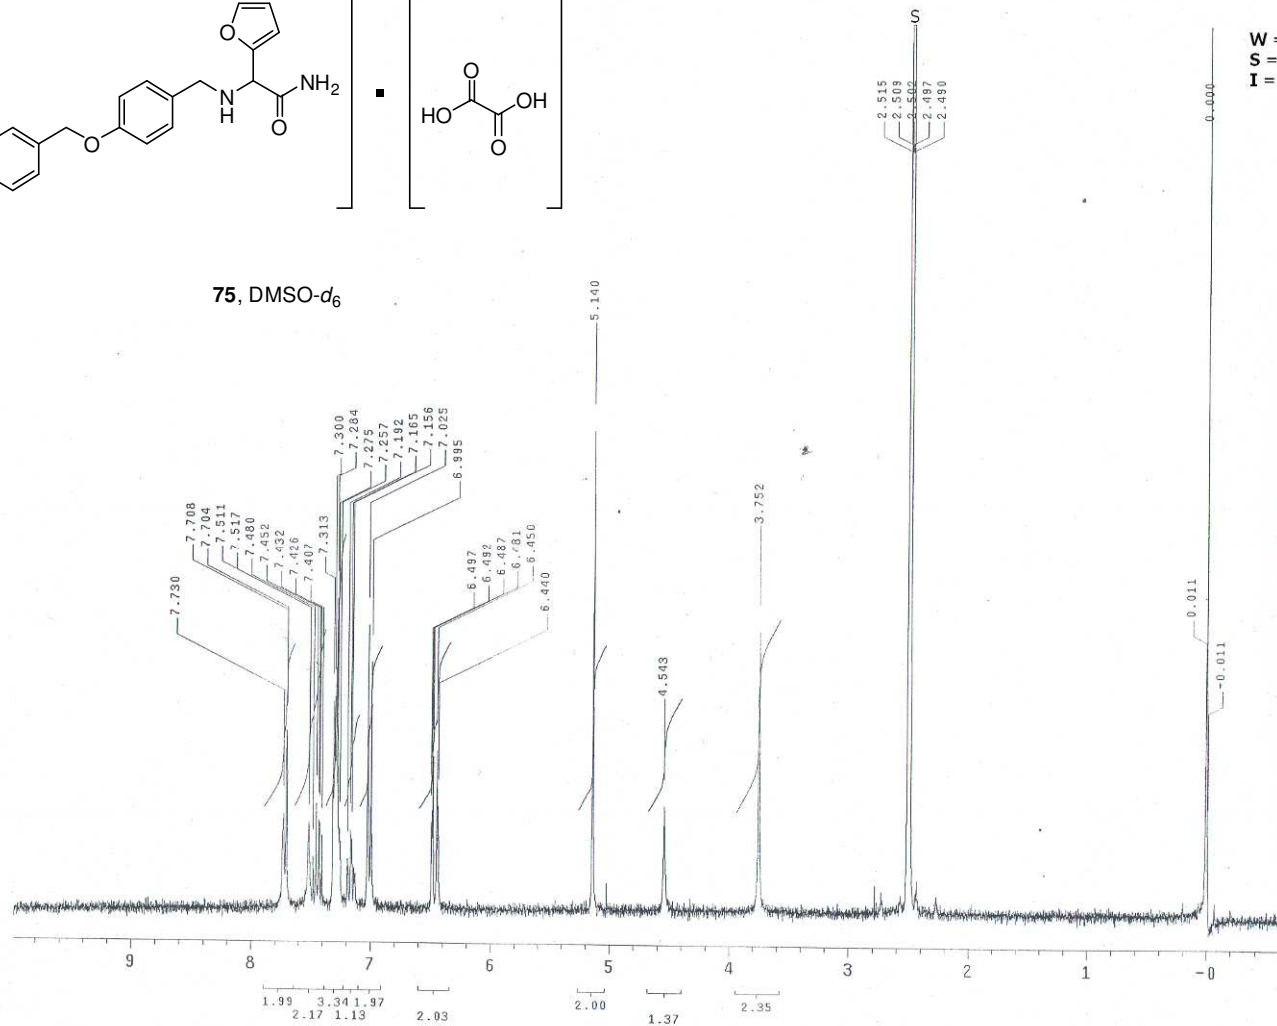

Supplement: NIHMS196942-supplement-2_si_002.pdf [file NIHMS196942-supplement-2_si_002.pdf]
